# Supplementary material for: 1,3-Dipolar [3 + 3] cycloaddition of α-halohydroxamate-based azaoxyallyl cations with hydrazonoyl chloride-derived nitrile imines
Source: Royal Society of Chemistry journal article supplement (doi:10.1039/c7ra09766b), 2017-01-01
Supplement: c7ra09766b1.pdf [file c7ra09766b1.pdf]

# Supporting Information

## 1,3-Dipolar [3+3] Cycloaddition of $\alpha$ -Halohydroxamate-based Azaoxyallyl Cations with Hydrazonoyl Chloride-derived Nitrile Imines

Hong-Wu Zhao,\* Yu-Di Zhao, Yue-Yang Liu, Li-Jiao Zhao, Xiu-Qing Song, Xiao-Qin Chen, Hai-Liang Pang, Juan Du, Ning-Ning Feng

College of Life Science and Bio-engineering, Beijing University of Technology, Beijing 100124, P.R. China; *Phone: 86-10-6739-6211; Fax: 86-10-6739-6211; Email: hwzhao@bjut.edu.cn*

## Table of Contents

|                                                                  |     |
|------------------------------------------------------------------|-----|
| 1. General Information .....                                     | S2  |
| 2. General Procedure .....                                       | S2  |
| 3. Screening of ratios of <b>1a/2a</b> /Et <sub>3</sub> N.....   | S2  |
| 4. Characterization.....                                         | S2  |
| 5. <sup>1</sup> H and <sup>13</sup> C NMR spectra .....          | S9  |
| 6. X-ray crystal data of compound ( <b>Z</b> )- <b>3ae</b> ..... | S35 |
| 7. Computational methods.....                                    | S37 |
| 8. References .....                                              | S52 |

## 1. General Information

Proton ( $^1\text{H}$ ) and carbon ( $^{13}\text{C}$ ) NMR spectra were recorded on 400 MHz instrument (400 MHz for  $^1\text{H}$  NMR, 100 MHz for  $^{13}\text{C}$  NMR) and calibrated using tetramethylsilane (TMS) as internal reference. High resolution mass spectra (HRMS) were recorded under electrospray ionization (ESI) conditions. The melting point of compounds was determined by a melting point instrument. Flash column chromatography was performed on silica gel (0.035-0.070 mm) using compressed air. Thin layer chromatography (TLC) was carried out on 0.25 mm SDS silica gel coated glass plates (60F254). Eluted plates were visualized using a 254 nm UV lamp. Unless otherwise indicated, all reagents were commercially available and used without further purification. All solvents were distilled from the appropriate drying agents immediately before using.  $\alpha$ -Halohydroxamates **1a-f** and hydrazonoyl chlorides **2a-2n** were prepared according to literature procedures.<sup>1-5</sup>

## 2. General Procedure

To a stirred solution of  $\alpha$ -halohydroxamate **1** (2.0 equiv, 0.2 mmol) in 0.5 mL of HFIP was added hydrazonoyl chlorides **2** (1.0 equiv, 0.1 mmol), followed by  $\text{Et}_3\text{N}$  (3.0 equiv, 0.3 mmol). The resulted reaction mixture was stirred at room temperature for 1.5-12 h. After the reaction was completed as indicated by TLC plate, the solvent was removed by evaporation and the crude product was purified by flash column chromatography on silica gel (petroleum ether / ethyl acetate = 80:1) to afford products **3** (24-96% yields).

## 3. Screening of ratios of **1a/2a/Et<sub>3</sub>N**.<sup>a</sup>

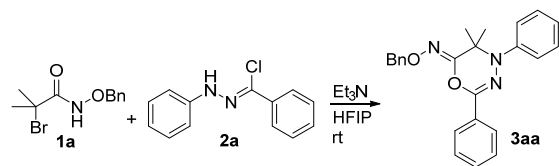

| Entry | Equivalent ratio<br>( <b>1a</b> / <b>2a</b> / $\text{Et}_3\text{N}$ ) | Time(h) | Yield <sup>b</sup> (%) |
|-------|-----------------------------------------------------------------------|---------|------------------------|
| 1     | 1.5:1:2.5                                                             | 1.5     | 60                     |
| 2     | 2:1:3                                                                 | 1.5     | 67                     |
| 3     | 2.5:1:3.5                                                             | 1.5     | 67                     |
| 4     | 1.8:1:2.8                                                             | 1.5     | 64                     |
| 5     | 2:1:3.5                                                               | 1.5     | 67                     |
| 6     | 2:1:2.5                                                               | 1.5     | 65                     |

<sup>a</sup>Unless otherwise noted, reactions were carried out with **1a** and **2a** in the presence of  $\text{Et}_3\text{N}$  in 0.5 mL of HFIP at the indicated equivalent ratios of **1a/2a/**  $\text{Et}_3\text{N}$  at room temperature. <sup>b</sup>Isolated yield.

## 4. Characterization

### (Z)-5,5-dimethyl-2,4-diphenyl-4H-1,3,4-oxadiazin-6(5H)-one O-benzyl oxime (3aa):

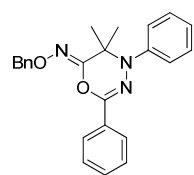

White solid, yield: 25.9 mg, 67%; M.P.=103.7-105.2 °C; <sup>1</sup>H NMR (400 MHz, CDCl<sub>3</sub>): δ 8.02-7.99 (m, 2H), 7.51 (d, *J*=7.2 Hz, 2H), 7.46-7.42 (m, 6H), 7.40-7.36 (m, 4H), 7.32-7.28 (m, 1H), 5.19 (s, 2H), 1.38 (s, 6H) ppm; <sup>13</sup>C NMR (100 MHz, CDCl<sub>3</sub>): δ 150.6, 144.9, 141.3, 137.8, 130.1, 129.7, 128.4, 128.4, 128.3, 127.9, 127.8, 126.4, 125.6, 76.7, 55.6, 20.8 ppm; HRMS (ESI) calculated for C<sub>24</sub>H<sub>24</sub>N<sub>3</sub>O<sub>2</sub> [M + H]<sup>+</sup>: 386.1866, found 386.1863.

### (Z)-5,5-dimethyl-4-phenyl-2-(o-tolyl)-4H-1,3,4-oxadiazin-6(5H)-one O-benzyl oxime (3ab):

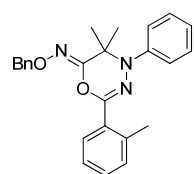

Light yellow solid, yield: 15.5 mg, 39%; M.P.=102.8-103.9 °C; <sup>1</sup>H NMR (400 MHz, CDCl<sub>3</sub>): δ 7.90 (d, *J*=8.4 Hz, 2H), 7.51 (d, *J*=7.2 Hz, 2H), 7.46-7.42 (m, 3H), 7.40-7.36 (m, 4H), 7.32-7.28 (m, 1H), 7.24 (d, *J*=8.0 Hz, 2H), 5.19 (s, 2H), 2.43 (s, 3H), 1.37 (s, 6H) ppm; <sup>13</sup>C NMR (100 MHz, CDCl<sub>3</sub>): δ 150.8, 145.0, 141.5, 139.9, 137.8, 129.1, 128.4, 128.3, 128.2, 127.9, 127.8, 127.3, 126.3, 125.6, 76.6, 55.6, 21.5, 20.7 ppm; HRMS (ESI) calculated for C<sub>25</sub>H<sub>26</sub>N<sub>3</sub>O<sub>2</sub> [M + H]<sup>+</sup>: 400.2020, found 400.2016.

### (Z)-2-(2-chlorophenyl)-5,5-dimethyl-4-phenyl-4H-1,3,4-oxadiazin-6(5H)-one O-benzyl oxime (3ac):

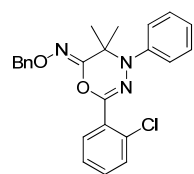

Yellow oil, yield: 10.2 mg, 24%; <sup>1</sup>H NMR (400 MHz, CDCl<sub>3</sub>): δ 7.71-7.68 (m, 1H), 7.48-7.44 (m, 3H), 7.41-7.38 (m, 3H), 7.36-7.33 (m, 4H), 7.32-7.31 (m, 2H), 7.29-7.25 (m, 1H), 5.13 (s, 2H), 1.40 (s, 6H) ppm; <sup>13</sup>C NMR (100 MHz, CDCl<sub>3</sub>): δ 150.5, 144.5, 140.6, 137.7, 133.2, 133.0, 131.0, 130.7, 130.5, 129.9, 129.8, 128.4, 128.3, 128.2, 128.1, 127.8, 126.7, 126.4, 123.7, 119.7, 76.6, 55.4, 20.6 ppm; HRMS (ESI) calculated for C<sub>24</sub>H<sub>23</sub>ClN<sub>3</sub>O<sub>2</sub> [M + H]<sup>+</sup>: 420.1473, found 420.1473.

### (Z)-5,5-dimethyl-4-phenyl-2-(m-tolyl)-4H-1,3,4-oxadiazin-6(5H)-one O-benzyl oxime (3ad):

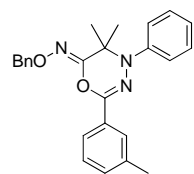

Yellow oil, yield: 20.2 mg, 51%; <sup>1</sup>H NMR (400 MHz, CDCl<sub>3</sub>): δ 7.81 (d, *J*=8.4 Hz, 2H), 7.53-7.51 (m, 2H), 7.46-7.41 (m, 5H), 7.38 (d, *J*=7.2 Hz, 2H), 7.35-7.29 (m, 2H), 7.28-7.25 (m, 1H), 5.20 (s, 2H), 2.43 (s, 3H), 1.37 (s, 6H) ppm; <sup>13</sup>C NMR (100 MHz, CDCl<sub>3</sub>): δ 150.7, 144.9, 141.5, 138.0, 137.8, 130.6, 130.0, 128.4, 128.3, 128.2, 127.9, 127.8, 126.4, 126.1, 122.8, 76.6, 55.6, 21.5, 20.7 ppm; HRMS (ESI) calculated for C<sub>25</sub>H<sub>26</sub>N<sub>3</sub>O<sub>2</sub> [M + H]<sup>+</sup>: 400.2020, found 400.2012.

### (Z)-2-(3-chlorophenyl)-5,5-dimethyl-4-phenyl-4H-1,3,4-oxadiazin-6(5H)-one O-benzyl oxime (3ae):

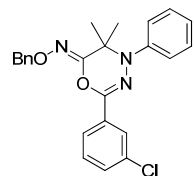

White solid, yield: 36.9 mg, 88%; M.P.=111.3-113.0 °C; <sup>1</sup>H NMR (400 MHz, CDCl<sub>3</sub>): δ 7.98 (s, 1H), 7.86 (d, *J*=7.2 Hz, 1H), 7.51 (d, *J*=6.8 Hz, 2H), 7.46-7.39 (m, 6H), 7.36-7.30 (m, 4H), 5.19 (s, 2H), 1.37 (s, 6H) ppm; <sup>13</sup>C NMR (100 MHz, CDCl<sub>3</sub>): δ 150.2, 144.6, 140.0, 137.7, 134.5, 131.9, 129.7, 129.6, 128.5, 128.4, 128.3, 127.9, 127.8, 126.6, 125.5, 123.6, 76.7, 55.7, 20.8 ppm; HRMS (ESI) calculated for C<sub>24</sub>H<sub>23</sub>ClN<sub>3</sub>O<sub>2</sub> [M + H]<sup>+</sup>: 420.1477, found 420.1473.

**(Z)-2-(3-fluorophenyl)-5,5-dimethyl-4-phenyl-4H-1,3,4-oxadiazin-6(5H)-one O-benzyl oxime (3af):**

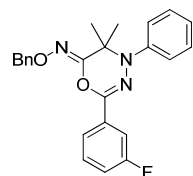

White solid, yield: 35.9 mg, 89%; M.P.=74.1-75.3 °C; <sup>1</sup>H NMR (400 MHz, CDCl<sub>3</sub>): δ 7.76 (d, *J*=8.0 Hz, 1H), 7.67 (d, *J*=9.6 Hz, 1H), 7.49 (d, *J*=7.2 Hz, 2H), 7.45-7.39 (m, 5H), 7.37-7.28 (m, 4H), 7.14-7.09 (m, 1H), 5.17 (s, 2H), 1.36 (s, 6H) ppm; <sup>13</sup>C NMR (100 MHz, CDCl<sub>3</sub>): δ 164.0, 161.6, 150.2, 144.6, 140.2, 140.1, 137.7, 132.4, 132.3, 129.9, 129.8, 128.4, 128.3, 128.2, 127.9, 127.8, 126.5, 121.2, 121.1, 116.7, 116.5, 112.6, 112.4, 76.7, 55.7, 20.8 ppm; HRMS (ESI) calculated for C<sub>24</sub>H<sub>23</sub>FN<sub>3</sub>O<sub>2</sub> [M + H]<sup>+</sup>: 404.1769, found 404.1766.

**(Z)-2-(3-bromophenyl)-5,5-dimethyl-4-phenyl-4H-1,3,4-oxadiazin-6(5H)-one O-benzyl oxime (3ag):**

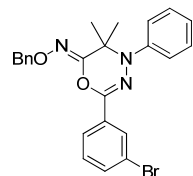

White oil, yield: 42.2 mg, 91%; <sup>1</sup>H NMR (400 MHz, CDCl<sub>3</sub>): δ 8.08 (s, 1H), 7.84 (d, *J*=8.0 Hz, 1H), 7.49-7.44 (m, 3H), 7.39-7.32 (m, 5H), 7.29-7.22 (m, 4H), 5.12 (s, 2H), 1.30 (s, 6H) ppm; <sup>13</sup>C NMR (100 MHz, CDCl<sub>3</sub>): δ 150.1, 144.5, 139.8, 137.7, 132.6, 132.1, 129.9, 128.5, 128.4, 128.3, 128.0, 127.8, 126.6, 124.1, 122.6, 76.7, 55.7, 20.8 ppm; HRMS (ESI) calculated for C<sub>24</sub>H<sub>23</sub>BrN<sub>3</sub>O<sub>2</sub> [M + H]<sup>+</sup>: 464.0968, found 464.0960.

**(Z)-5,5-dimethyl-2-(3-nitrophenyl)-4-phenyl-4H-1,3,4-oxadiazin-6(5H)-one O-benzyl oxime (3ah):**

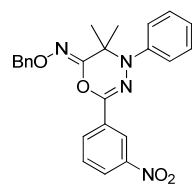

Yellow solid, yield: 41.3 mg, 96%; M.P.=121.9-123.6 °C; <sup>1</sup>H NMR (400 MHz, CDCl<sub>3</sub>): δ 8.74 (s, 1H), 8.22-8.20 (m, 2H), 7.54 (d, *J*=8.0 Hz, 1H), 7.46 (d, *J*=7.2 Hz, 2H), 7.41-7.37 (m, 4H), 7.33-7.29 (m, 4H), 5.14 (s, 2H), 1.34 (s, 6H) ppm; <sup>13</sup>C NMR (100 MHz, CDCl<sub>3</sub>): δ 149.7, 148.5, 144.2, 139.1, 137.5, 131.9, 131.0, 129.5, 128.6, 128.4, 128.0, 127.8, 126.8, 124.1, 120.5, 76.8, 55.8, 20.9 ppm; HRMS (ESI) calculated for C<sub>24</sub>H<sub>23</sub>N<sub>4</sub>O<sub>4</sub> [M + H]<sup>+</sup>: 431.1714, found 431.1717.

**(Z)-5,5-dimethyl-4-phenyl-2-(p-tolyl)-4H-1,3,4-oxadiazin-6(5H)-one O-benzyl oxime (3ai):**

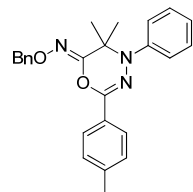

Yellow solid, yield: 18.0 mg, 45%; M.P.=118.2-120.0 °C; <sup>1</sup>H NMR (400 MHz, CDCl<sub>3</sub>): δ 7.88 (d, *J*=8.4 Hz, 2H), 7.51 (d, *J*=7.2 Hz, 2H), 7.44 (d, *J*=7.2 Hz, 2H), 7.40 (d, *J*=8.0 Hz, 2H), 7.36 (d, *J*=7.6 Hz, 3H), 7.31-7.28 (m, 1H), 7.23 (d, *J*=8.0 Hz, 2H), 5.18 (s, 2H), 2.42 (s, 3H), 1.36 (s, 6H) ppm; <sup>13</sup>C NMR (100 MHz, CDCl<sub>3</sub>): δ 150.7, 145.0, 141.5, 139.9, 137.8, 129.1, 128.4, 128.3, 128.2, 127.9, 127.8, 127.3, 126.3, 125.6, 76.6, 55.6, 21.5, 20.7 ppm; HRMS (ESI) calculated for C<sub>25</sub>H<sub>26</sub>N<sub>3</sub>O<sub>2</sub> [M + H]<sup>+</sup>: 400.2020, found 400.2008.

**(Z)-2-(4-chlorophenyl)-5,5-dimethyl-4-phenyl-4H-1,3,4-oxadiazin-6(5H)-one O-benzyl oxime (3aj):**

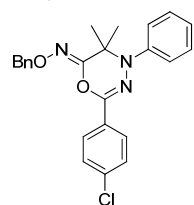

White solid, yield: 28.3 mg, 68%; M.P.=112.5-114.2 °C; <sup>1</sup>H NMR (400 MHz, CDCl<sub>3</sub>): δ 7.90 (d, *J*=8.4 Hz, 2H), 7.49 (d, *J*=6.8 Hz, 2H), 7.44-7.37 (m, 7H), 7.35-7.28 (m, 3H), 5.17 (s, 2H), 1.36 (s, 6H) ppm; <sup>13</sup>C NMR (100 MHz, CDCl<sub>3</sub>): δ 150.3, 144.7, 140.4, 137.6, 135.7, 128.6, 128.4, 128.3, 127.9, 127.8, 126.8, 126.5, 76.7, 55.6, 20.8 ppm; HRMS (ESI) calculated for C<sub>24</sub>H<sub>23</sub>ClN<sub>3</sub>O<sub>2</sub> [M + H]<sup>+</sup>: 420.1478, found 420.1473.

**(Z)-2-(4-fluorophenyl)-5,5-dimethyl-4-phenyl-4H-1,3,4-oxadiazin-6(5H)-one O-benzyl oxime (3ak):**

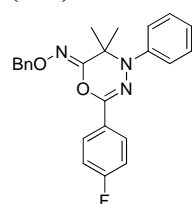

Yellow solid, yield: 27.5 mg, 67%; M.P.=97.9-99.3 °C; <sup>1</sup>H NMR (400 MHz, CDCl<sub>3</sub>): δ 7.93-7.90 (m, 2H), 7.45 (d, *J*=7.2 Hz, 2H), 7.40-7.33 (m, 5H), 7.30-7.24 (m, 3H), 7.06 (t, *J*=8.8 Hz, 2H), 5.12 (s, 2H), 1.31 (s, 6H) ppm; <sup>13</sup>C NMR (100 MHz, CDCl<sub>3</sub>): δ 165.1, 162.6, 150.4, 144.8, 140.6, 137.7, 128.4, 128.0, 127.8, 127.7, 127.6, 126.4, 126.3, 126.2, 115.6, 115.3, 76.7, 55.6, 20.8 ppm; HRMS (ESI) calculated for C<sub>24</sub>H<sub>23</sub>FN<sub>3</sub>O<sub>2</sub> [M + H]<sup>+</sup>: 404.1769, found 404.1761.

**(Z)-5,5-dimethyl-4-phenyl-2-(4-(trifluoromethyl)phenyl)-4H-1,3,4-oxadiazin-6(5H)-one O-benzyl oxime (3al):**

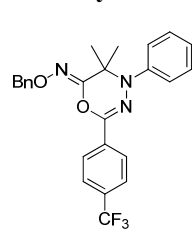

White solid, yield: 39.2 mg, 87%; M.P.=130.1-131.3 °C; <sup>1</sup>H NMR (400 MHz, CDCl<sub>3</sub>): δ 8.07 (d, *J*=8.4 Hz, 2H), 7.66 (d, *J*=8.4 Hz, 2H), 7.49 (d, *J*=7.2 Hz, 2H), 7.45-7.38 (m, 5H), 7.40-7.30 (m, 3H), 5.18 (s, 2H), 1.38 (s, 6H) ppm; <sup>13</sup>C NMR (100 MHz, CDCl<sub>3</sub>): δ 150.0, 144.4, 139.9, 137.6, 133.4, 131.4, 131.1, 128.5, 128.4, 128.0, 127.8, 126.6, 125.7, 125.4, 125.3, 125.2, 122.7, 76.7, 55.7, 20.8 ppm; HRMS (ESI) calculated for C<sub>25</sub>H<sub>23</sub>F<sub>3</sub>N<sub>3</sub>O<sub>2</sub> [M + H]<sup>+</sup>: 454.1737, found 454.1733.

**(Z)-5,5-dimethyl-2-(4-nitrophenyl)-4-phenyl-4H-1,3,4-oxadiazin-6(5H)-one O-benzyl oxime (3am):**

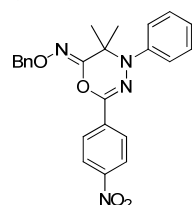

Yellow solid, yield: 41.0 mg, 95%; M.P.=130.5-132.1 °C; <sup>1</sup>H NMR (400 MHz, CDCl<sub>3</sub>): δ 8.22 (d, *J*=9.2 Hz, 2H), 8.06 (d, *J*=8.8 Hz, 2H), 7.47-7.45 (m, 2H), 7.42 (t, *J*=1.6 Hz, 1H), 7.39 (d, *J*=1.6 Hz, 2H), 7.38-7.35 (m, 2H), 7.32-7.30 (m, 2H), 7.28 (s, 1H), 5.14 (s, 2H), 1.35 (s, 6H) ppm; <sup>13</sup>C NMR (100 MHz, CDCl<sub>3</sub>): δ 149.5, 148.2, 144.1, 139.1, 137.4, 135.9, 128.6, 128.5, 128.4, 128.1, 127.8, 126.9, 126.0, 123.7, 76.8, 55.9, 53.5, 21.0 ppm; HRMS (ESI) calculated for C<sub>24</sub>H<sub>23</sub>N<sub>4</sub>O<sub>4</sub> [M + H]<sup>+</sup>: 431.1714, found 431.1708.

**(Z)-2-isopropyl-5,5-dimethyl-4-phenyl-4H-1,3,4-oxadiazin-6(5H)-one O-benzyl oxime (3an):**

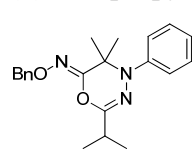

White solid, yield: 11.8 mg, 34%; M.P.=93.2-94.8 °C; <sup>1</sup>H NMR (400 MHz, CDCl<sub>3</sub>): δ 7.49-7.36 (m, 4H), 7.36-7.33 (m, 3H), 7.28-7.23 (m, 3H), 5.10 (s, 2H), 2.80-2.69 (m, 1H), 1.30 (s, 3H), 1.28 (s, 3H), 1.24 (s, 6H) ppm; <sup>13</sup>C NMR (100 MHz, CDCl<sub>3</sub>): δ 151.1, 148.8, 145.1, 137.8, 128.3, 128.2, 128.1, 127.8, 127.5, 126.1, 76.5, 55.0, 31.5, 20.2, 19.7 ppm; HRMS (ESI) calculated for C<sub>21</sub>H<sub>26</sub>N<sub>3</sub>O<sub>2</sub> [M + H]<sup>+</sup>: 352.2020, found 352.2017.

**(Z)-5,5-dimethyl-2-(3-nitrophenyl)-4-phenyl-4H-1,3,4-oxadiazin-6(5H)-one O-methyl oxime (3bh):**

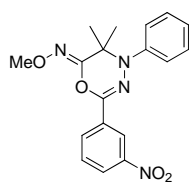

Yellow solid, yield: 33.3 mg, 94%; M.P.=116.6-117.3 °C; <sup>1</sup>H NMR (400 MHz, CDCl<sub>3</sub>): δ 8.74 (s, 1H), 8.25-8.23 (m, 2H), 7.57 (t, *J*=8.0 Hz, 1H), 7.42-7.38 (m, 2H), 7.31 (d, *J*=7.2 Hz, 3H), 3.94 (s, 3H), 1.36 (s, 6H) ppm; <sup>13</sup>C NMR (100 MHz, CDCl<sub>3</sub>): δ 149.3, 148.5, 144.2, 139.0, 131.9, 131.0, 129.4, 128.5, 127.8, 126.8, 124.1, 120.4, 62.8, 55.7, 20.8 ppm; HRMS (ESI) calculated for C<sub>18</sub>H<sub>19</sub>N<sub>4</sub>O<sub>4</sub> [M + H]<sup>+</sup>: 355.1401, found 355.1398.

**(Z)-2-(3-nitrophenyl)-4,5-diphenyl-4H-1,3,4-oxadiazin-6(5H)-one O-benzyl oxime (3ch):**

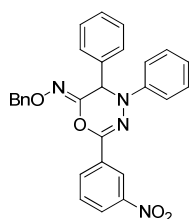

Yellow oil, yield: 25.8 mg, 54%; <sup>1</sup>H NMR (400 MHz, CDCl<sub>3</sub>): δ 8.76 (s, 1H), 8.22-8.17 (m, 2H), 7.54-7.45 (m, 3H), 7.40-7.39 (m, 2H), 7.37-7.31 (m, 4H), 7.24-7.21 (m, 6H), 6.99-6.96 (m, 1H), 5.92 (s, 1H), 5.19 (s, 2H) ppm; <sup>13</sup>C NMR (100 MHz, CDCl<sub>3</sub>): δ 153.1, 148.5, 144.5, 144.4, 143.9, 138.5, 138.2, 137.5, 136.6, 133.6, 133.1, 131.6, 131.5, 131.0, 130.8, 129.5, 129.4, 129.3, 129.1, 128.8, 128.7, 128.6, 128.5, 128.4, 128.3, 128.2, 126.8, 126.4, 124.1, 121.7, 121.6, 120.5, 120.3, 114.1, 113.9, 76.9, 76.8, 54.6, 50.9 ppm; HRMS (ESI) calculated for C<sub>28</sub>H<sub>23</sub>N<sub>4</sub>O<sub>4</sub> [M + H]<sup>+</sup>: 479.1714, found 479.1711.

**(Z)-3-(3-nitrophenyl)-1-phenyl-4-oxa-1,2-diazaspiro[5.5]undec-2-en-5-one O-benzyl oxime (3dh):**

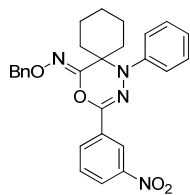

Yellow solid, yield: 42.1 mg, 90%; M.P.=141.9-143.5 °C; <sup>1</sup>H NMR (400 MHz, CDCl<sub>3</sub>): δ 8.72 (s, 1H), 8.21-8.19 (m, 2H), 7.53 (t, *J*=8.0 Hz, 1H), 7.48-7.46 (m, 2H), 7.41-7.36 (m, 4H), 7.34-7.26 (m, 4H), 5.18 (s, 2H), 2.09 (d, *J*=12.4 Hz, 2H), 1.62-1.52 (m, 5H), 1.33-1.25 (m, 2H), 0.89-0.86 (m, 1H) ppm; <sup>13</sup>C NMR (100 MHz, CDCl<sub>3</sub>): δ 148.4, 147.3, 143.7, 138.8, 137.8, 131.9, 131.0, 129.4, 128.6, 128.5, 128.4, 128.0, 126.7, 123.9, 120.4, 76.7, 59.3, 28.8, 25.3, 22.7 ppm; HRMS (ESI) calculated for C<sub>27</sub>H<sub>27</sub>N<sub>4</sub>O<sub>4</sub> [M + H]<sup>+</sup>: 471.2027, found 471.2025.

**(Z)-5-methyl-2-(3-nitrophenyl)-4-phenyl-4H-1,3,4-oxadiazin-6(5H)-one O-benzyl oxime (3eh):**

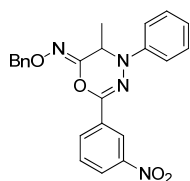

Yellow oil, yield: 10.9 mg, 25%; <sup>1</sup>H NMR (400 MHz, CDCl<sub>3</sub>): δ 8.85 (s, 1H), 8.33-8.26 (m, 2H), 7.65-7.61 (m, 1H), 7.47 (d, *J*=6.8 Hz, 2H), 7.44-7.36 (m, 5H), 7.32 (d, *J*=8.0 Hz, 2H), 7.05 (t, *J*=7.2 Hz, 1H), 5.19-5.12 (m, 2H), 4.95-4.90 (m, 1H), 1.34 (d, *J*=6.4 Hz, 3H) ppm; <sup>13</sup>C NMR (100 MHz, CDCl<sub>3</sub>): δ 148.6, 145.5, 144.0, 138.1, 137.3, 131.7, 131.0, 130.9, 129.6, 129.5, 128.6, 128.5, 128.2, 128.1, 124.2, 121.9, 120.5, 114.6, 76.7, 47.4, 13.1 ppm; HRMS (ESI) calculated for C<sub>23</sub>H<sub>21</sub>N<sub>4</sub>O<sub>4</sub> [M + H]<sup>+</sup>: 417.1557, found 417.1554.

**(Z)-5,5-dimethyl-2,4-diphenyl-4H-1,3,4-oxadiazin-6(5H)-one O-methyl oxime (3ba):**

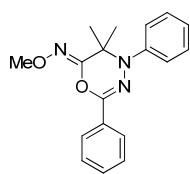

White oil, yield: 18.9 mg, 62%; <sup>1</sup>H NMR (400 MHz, CDCl<sub>3</sub>): δ 8.01-7.99 (m, 2H), 7.44-7.42 (m, 4H), 7.40-7.36 (m, 3H), 7.32-7.28 (m, 1H), 3.98 (s, 3H), 1.39 (s, 6H) ppm; <sup>13</sup>C NMR (100 MHz, CDCl<sub>3</sub>): δ 150.2, 144.9, 141.2, 130.1, 129.8, 128.4, 128.3, 127.8, 126.4, 125.6, 62.7, 55.5, 20.7 ppm; HRMS (ESI) calculated for C<sub>18</sub>H<sub>20</sub>N<sub>3</sub>O<sub>2</sub> [M + H]<sup>+</sup>: 310.1550, found 310.1546.

**(Z)-2,4,5-triphenyl-4H-1,3,4-oxadiazin-6(5H)-one O-benzyl oxime (3ca):**

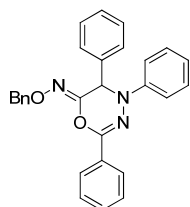

White solid, yield: 14.3 mg, 33%; M.P.=149.3-151.2 °C; <sup>1</sup>H NMR (400 MHz, CDCl<sub>3</sub>): δ 8.03-8.01 (m, 2H), 7.50 (d, *J*=6.8 Hz, 2H), 7.44-7.42 (m, 5H), 7.38-7.33 (m, 3H), 7.28 (d, *J*=7.2 Hz, 7H), 6.99 (t, *J*=7.2 Hz, 1H), 5.95 (s, 1H), 5.24 (s, 2H) ppm; <sup>13</sup>C NMR (100 MHz, CDCl<sub>3</sub>): δ 144.9, 144.8, 140.3, 137.7, 133.5, 129.8, 129.7, 129.3, 129.1, 129.0, 128.7, 128.6, 128.5, 128.4, 128.3, 128.1, 128.0, 126.9, 126.6, 125.6, 125.5, 121.0, 113.9, 113.7, 76.7, 54.4 ppm; HRMS (ESI)

calculated for C<sub>28</sub>H<sub>24</sub>N<sub>3</sub>O<sub>2</sub> [M + H]<sup>+</sup>: 434.1863, found 434.1860.

**(Z)-1,3-diphenyl-4-oxa-1,2-diazaspiro[5.5]undec-2-en-5-one O-benzyl oxime (3da):**

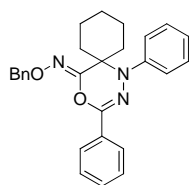

White solid, yield: 11.4 mg, 27%; M.P.=118.0-119.0 °C; <sup>1</sup>H NMR (400 MHz, CDCl<sub>3</sub>): δ 7.99-7.96 (m, 2H), 7.51 (d, *J*=7.2 Hz, 2H), 7.44-7.40 (m, 6H), 7.38-7.36 (m, 1H), 7.34-7.29 (m, 4H), 5.22 (s, 2H), 7.16 (d, *J*=12.4 Hz, 2H), 1.66-1.51 (m, 5H), 1.36-1.28 (m, 2H), 0.96-0.92 (m, 1H) ppm; <sup>13</sup>C NMR (100 MHz, CDCl<sub>3</sub>): δ 148.2, 144.4, 141.1, 138.2, 130.0, 129.6, 128.6, 128.4, 128.3, 128.2,

128.1, 127.8, 126.3, 125.6, 76.6, 59.0, 28.7, 25.4, 22.8 ppm; HRMS (ESI) calculated for C<sub>27</sub>H<sub>28</sub>N<sub>3</sub>O<sub>2</sub> [M + H]<sup>+</sup>: 426.2176, found 426.2179.

**(Z)-2-(3-bromophenyl)-5,5-dimethyl-4-phenyl-4H-1,3,4-oxadiazin-6(5H)-one O-methyl oxime (3bg):**

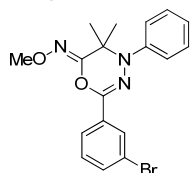

White oil, yield: 34.1 mg, 88%; <sup>1</sup>H NMR (400 MHz, CDCl<sub>3</sub>): δ 8.07 (s, 1H), 7.86 (d, *J*=8.0 Hz, 1H), 7.50 (d, *J*=8.0 Hz, 1H), 7.40-7.36 (m, 2H), 7.31-7.25 (m, 4H), 3.93 (s, 3H), 1.33 (s, 6H) ppm; <sup>13</sup>C NMR (100 MHz, CDCl<sub>3</sub>): δ 149.8, 144.5, 139.7, 132.6, 132.0, 129.9, 128.5, 128.3, 127.8, 126.6, 124.1, 122.5, 62.7, 55.5, 20.7 ppm; HRMS (ESI) calculated for C<sub>18</sub>H<sub>19</sub>BrN<sub>3</sub>O<sub>2</sub> [M + H]<sup>+</sup>: 388.0655, found 388.0655.

**(Z)-3-(3-bromophenyl)-1-phenyl-4-oxa-1,2-diazaspiro[5.5]undec-2-en-5-one O-benzyl oxime (3dg):**

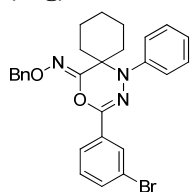

White oil, yield: 29.4 mg, 58%; <sup>1</sup>H NMR (400 MHz, CDCl<sub>3</sub>): δ 8.05 (s, 1H), 7.84-7.82 (m, 1H), 7.49-7.45 (m, 3H), 7.39-7.34 (m, 5H), 7.27-7.22 (m, 4H), 5.16 (s, 2H), 2.08 (d, *J*=12.4 Hz, 2H), 1.56-1.49 (m, 5H), 1.30-1.22 (m, 2H), 0.88-0.84 (m, 1H) ppm; <sup>13</sup>C NMR (100 MHz, CDCl<sub>3</sub>): δ 147.7, 144.0, 139.6, 138.0, 132.5, 132.0, 129.9, 128.6, 128.5, 128.4, 128.3, 128.2, 127.9, 126.5, 124.0, 122.5, 76.6,

59.1, 28.7, 25.4, 22.8 ppm; HRMS (ESI) calculated for C<sub>27</sub>H<sub>27</sub>BrN<sub>3</sub>O<sub>2</sub> [M + H]<sup>+</sup>: 504.1281, found 504.1279.

**(Z)-2-(3-chlorophenyl)-5,5-dimethyl-4-phenyl-4H-1,3,4-oxadiazin-6(5H)-one O-methyl oxime (3be):**

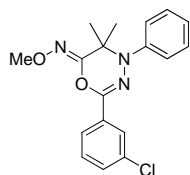

White oil, yield: 25.6 mg, 75%;  $^1\text{H}$  NMR (400 MHz,  $\text{CDCl}_3$ ):  $\delta$  7.92 (s, 1H), 7.83-7.80 (m, 1H), 7.40-7.34 (m, 3H), 7.33-7.31 (m, 2H), 7.29-7.24 (m, 2H), 3.93 (s, 3H), 1.33 (s, 6H) ppm;  $^{13}\text{C}$  NMR (100 MHz,  $\text{CDCl}_3$ ):  $\delta$  149.8, 144.5, 139.9, 134.5, 131.8, 129.7, 129.6, 128.5, 127.8, 126.6, 125.5, 123.6, 62.7, 55.5, 20.7 ppm; HRMS (ESI) calculated for  $\text{C}_{18}\text{H}_{19}\text{ClN}_3\text{O}_2$   $[\text{M} + \text{H}]^+$ : 344.1160, found 344.1158.

**(Z)-2-(3-fluorophenyl)-5,5-dimethyl-4-phenyl-4H-1,3,4-oxadiazin-6(5H)-one O-methyl oxime (3bf):**

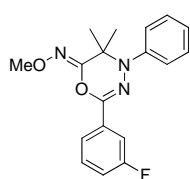

White oil, yield: 26.7 mg, 82%;  $^1\text{H}$  NMR (400 MHz,  $\text{CDCl}_3$ ):  $\delta$  7.71 (d,  $J=7.6$  Hz, 1H), 7.65-7.62 (m, 1H), 7.39-7.33 (m, 3H), 7.31-7.24 (m, 3H), 7.09-7.05 (m, 1H), 3.92 (s, 3H), 1.33 (s, 6H) ppm;  $^{13}\text{C}$  NMR (100 MHz,  $\text{CDCl}_3$ ):  $\delta$  164.0, 161.6, 149.8, 144.6, 140.1, 140.0, 132.3, 132.2, 130.0, 129.9, 128.4, 127.8, 126.5, 121.2, 121.1, 116.7, 116.5, 112.6, 112.4, 62.7, 55.5, 20.7 ppm; HRMS (ESI) calculated for  $\text{C}_{18}\text{H}_{19}\text{FN}_3\text{O}_2$   $[\text{M} + \text{H}]^+$ : 328.1456, found 328.1451.

**(Z)-5,5-dimethyl-4-phenyl-2-(4-(trifluoromethyl)phenyl)-4H-1,3,4-oxadiazin-6(5H)-one O-methyl oxime (3bl):**

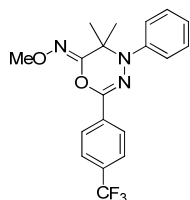

White oil, yield: 34.1 mg, 90%; M.P.=84.5-84.9 °C;  $^1\text{H}$  NMR (400 MHz,  $\text{CDCl}_3$ ):  $\delta$  8.04 (d,  $J=8.4$  Hz, 2H), 7.63 (d,  $J=8.4$  Hz, 2H), 7.41-7.37 (m, 2H), 7.31-7.27 (m, 3H), 3.93 (s, 3H), 1.35 (s, 6H) ppm;  $^{13}\text{C}$  NMR (100 MHz,  $\text{CDCl}_3$ ):  $\delta$  149.6, 144.4, 139.8, 133.4, 131.4, 131.1, 128.5, 127.8, 126.7, 125.7, 125.5, 125.4, 125.3, 125.2, 125.1, 122.7, 76.7, 62.7, 55.6, 20.8 ppm; HRMS (ESI) calculated for  $\text{C}_{19}\text{H}_{19}\text{F}_3\text{N}_3\text{O}_2$   $[\text{M} + \text{H}]^+$ : 378.1424, found 378.1424.





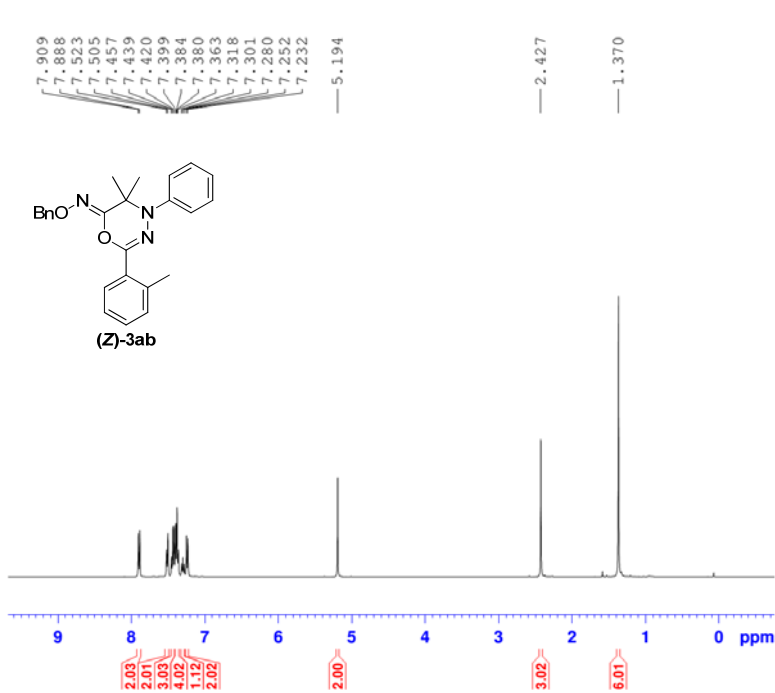

```

NAME      NMR
EXPNO    4710
PROCNO    1
Date_     20161226
Time      10.30
INSTRUM   spect
PROBHD    5 mm PABBO BB-
PULPROG   zg30
TD         65536
SOLVENT   CDCl3
NS         4
DS         2
SWH        8223.685 Hz
FIDRES     0.125483 Hz
AQ         3.9846387 sec
RG         114
DW         60.800 usec
DE         6.50 usec
TE         673.2 K
D1         1.00000000 sec
TD0        1

```

```

===== CHANNEL f1 =====
NUC1      1H
P1        14.50 usec
PL1       -2.32 dB
PL1W      16.91636658 W
SF01      400.1724712 MHz
SI        32768
SF        400.1700000 MHz
WDW       EM
SSB       0
LB        0.30 Hz
GB        0
PC        1.00

```

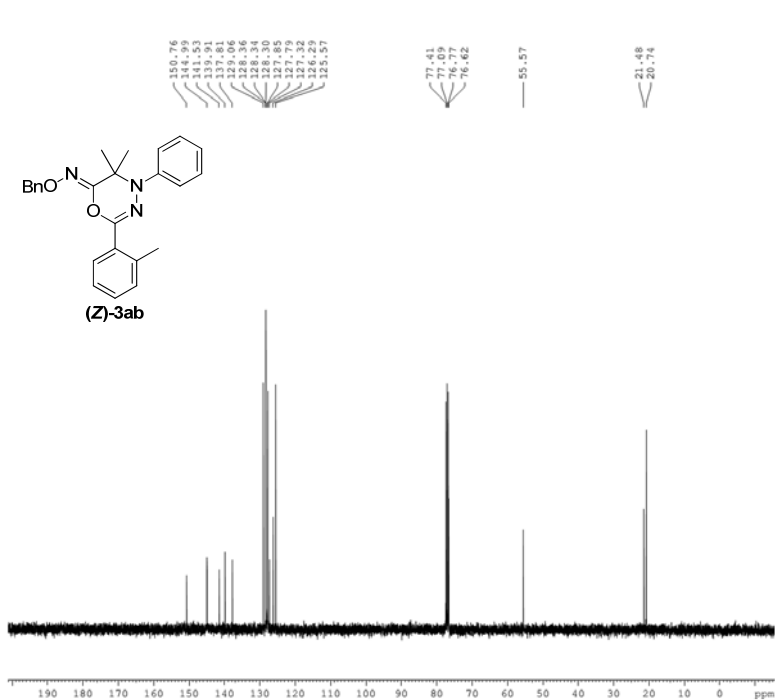

```

NAME      NMR
EXPNO    4709
PROCNO    1
Date_     20161226
Time      10.26
INSTRUM   spect
PROBHD    5 mm PABBO BB-
PULPROG   zgpg30
TD         65536
SOLVENT   CDCl3
NS         18
DS         4
SWH        24038.461 Hz
FIDRES     0.366798 Hz
AQ         1.3631988 sec
RG         812
DW         20.800 usec
DE         6.50 usec
TE         673.2 K
D1         2.00000000 sec
D11        0.03000000 sec
TD0        1

```

```

===== CHANNEL f1 =====
NUC1      13C
P1        11.70 usec
PL1       -2.00 dB
PL1W      48.76812744 W
SF01      100.6228270 MHz

===== CHANNEL f2 =====
CPDPRG2   waltz16
NUC2      1H
PCPD2     80.00 usec
PL2       -2.83 dB
PL12      12.00 dB
PL13      14.00 dB
PL1W      16.91636658 W
PL12W     0.55629748 W
PL13W     0.35100001 W
SF02      400.1716007 MHz
SI        32768
SF        100.6228270 MHz
WDW       EM
SSB       0
LB        1.00 Hz
GB        0
PC        1.40

```

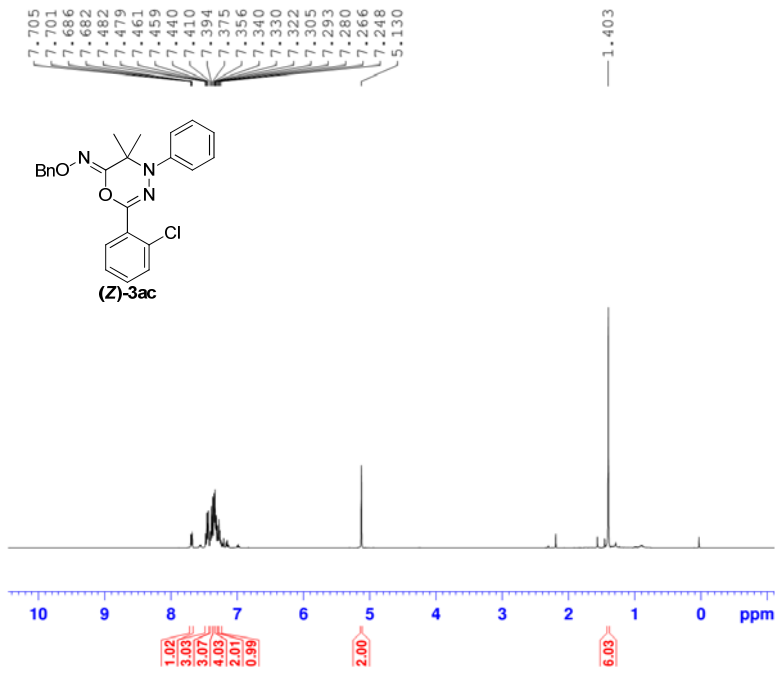

```

NAME          NMR
EXPNO         4717
PROCNO        1
Date_         20161228
Time          14.18
INSTRUM       spect
PROBHD        5 mm PABBO BB-
PULPROG       zg30
TD            65536
SOLVENT       CDCl3
NS            9
DS            2
SWH           8223.685 Hz
FIDRES        0.125483 Hz
AQ            3.9846387 sec
RG            114
DW            60.800 usec
DE            6.50 usec
TE            673.2 K
D1            1.00000000 sec
TDO           1

```

```

===== CHANNEL f1 =====
NUC1          1H
P1            14.50 usec
PL1           -2.83 dB
PL1W          16.91636658 W
SFO1          400.1724712 MHz
SI            32768
SF            400.1700000 MHz
WDW           EM
SSB           0
LB            0.30 Hz
GB            0
PC            1.00

```

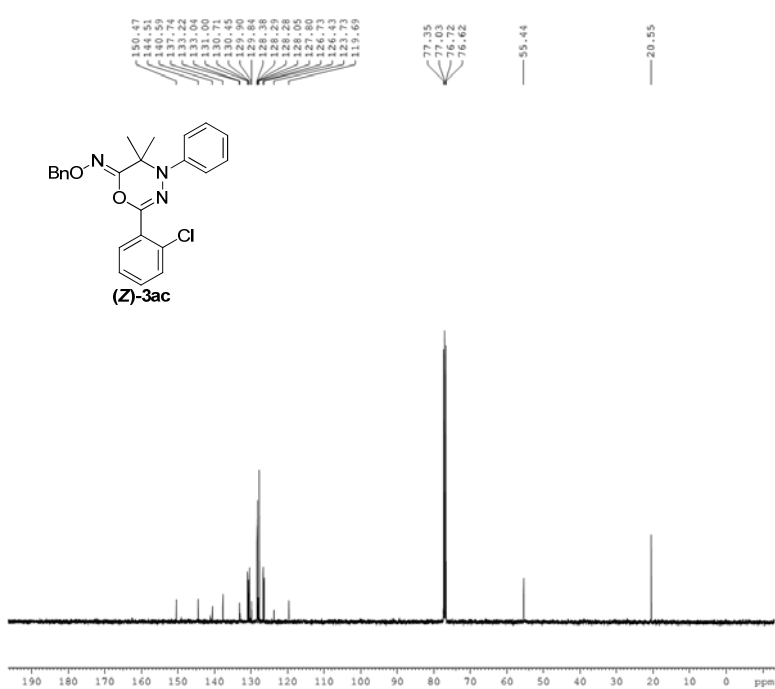

```

NAME          NMR
EXPNO         4718
PROCNO        1
Date_         20161228
Time          14.34
INSTRUM       spect
PROBHD        5 mm PABBO BB-
PULPROG       zgpg30
TD            65536
SOLVENT       CDCl3
NS            195
DS            4
SWH           24038.461 Hz
FIDRES        0.366798 Hz
AQ            1.3631988 sec
RG            812
DW            20.800 usec
DE            6.50 usec
TE            673.2 K
D1            2.00000000 sec
D11           0.03000000 sec
TDO           1

```

```

===== CHANNEL f1 =====
NUC1          13C
P1            11.70 usec
PL1           -2.00 dB
PL1W          48.76812744 W
SFO1          100.6228888 MHz

===== CHANNEL f2 =====
CPDPRG2       waltz16
NUC2          1H
PCPD2         80.00 usec
PL2           -2.83 dB
PL12          12.00 dB
PL13          14.00 dB
PL2W          16.91636658 W
PL12W         0.55629748 W
PL13W         0.35100001 W
SFO2          400.1716007 MHz
SI            32768
SF            100.6228270 MHz
WDW           EM
SSB           0
LB            1.00 Hz
GB            0
PC            1.40

```

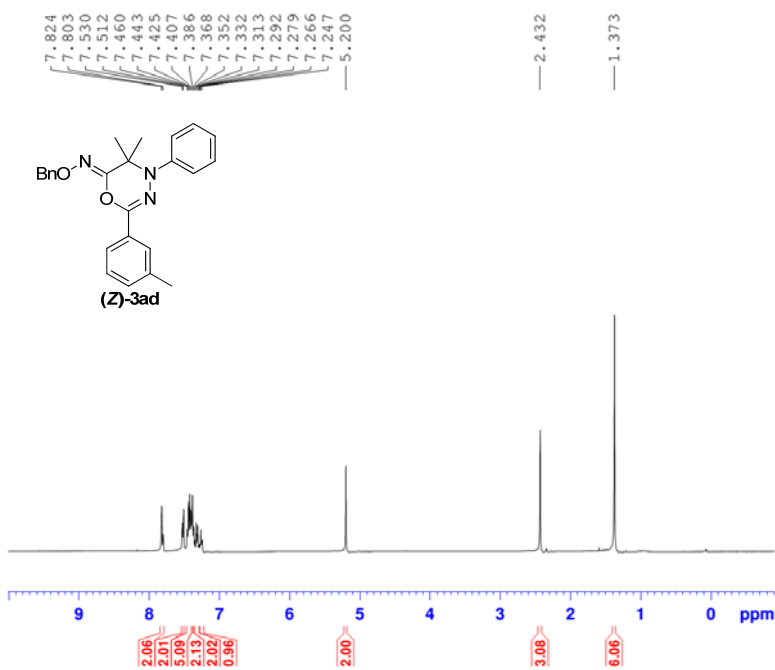

```

NAME          NMR
EXPNO         4725
PROCNO        1
Date_         20161230
Time          16.06
INSTRUM       spect
PROBHD        5 mm PABBO BB-
PULPROG       zg30
TD            65536
SOLVENT       CDCl3
NS            4
DS            2
SWH           8223.685 Hz
FIDRES        0.125483 Hz
AQ            3.9846387 sec
RG            90.5
DW            60.800 usec
DE            6.50 usec
TE            294.3 K
D1            1.00000000 sec
TD0           1
  
```

```

===== CHANNEL f1 =====
NUC1          1H
P1            14.50 usec
PL1          -2.83 dB
PL1W         16.91636658 W
SFO1         400.1724712 MHz
SI           32768
SF           400.1700000 MHz
WDW          EM
SSB          0
LB           0.30 Hz
GB           0
PC           1.00
  
```

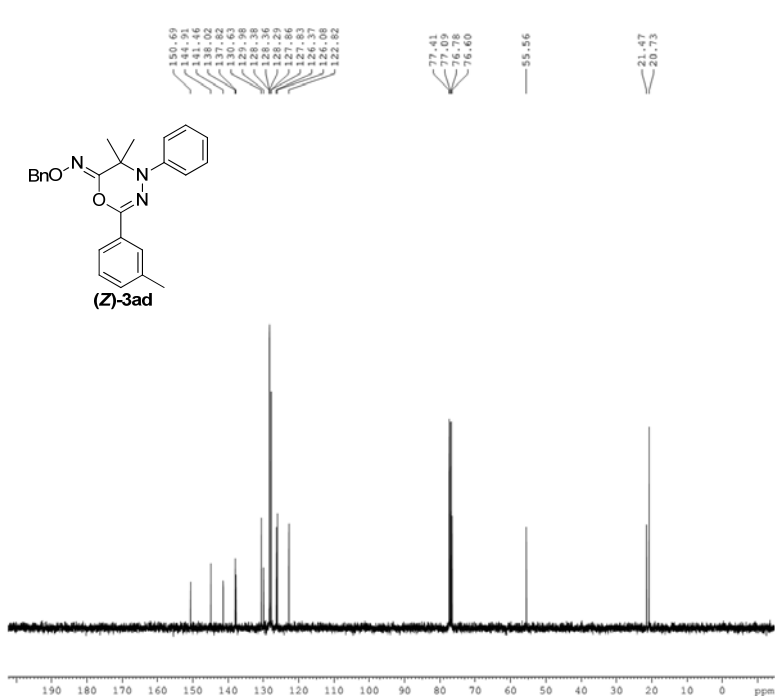

```

NAME          NMR
EXPNO         4726
PROCNO        1
Date_         20161230
Time          16.09
INSTRUM       spect
PROBHD        5 mm PABBO BB-
PULPROG       zgpg30
TD            65536
SOLVENT       CDCl3
NS            4
DS            32
SWH           24038.461 Hz
FIDRES        0.366798 Hz
AQ            1.3631988 sec
RG            406
DW            20.800 usec
DE            6.50 usec
TE            294.5 K
D1            2.00000000 sec
D11           0.03000000 sec
TD0           1
  
```

```

===== CHANNEL f1 =====
NUC1          13C
P1            11.70 usec
PL1          -2.00 dB
PL1W         48.76812744 W
SFO1         100.6328888 MHz
  
```

```

===== CHANNEL f2 =====
CPDPRG2       waltz16
NUC2          1H
PCPD2         80.00 usec
PL2          -2.83 dB
PL12         12.00 dB
PL13         14.00 dB
PL2W         16.91636658 W
PL12W        0.55629748 W
PL13W        0.35100001 W
SFO2         400.1716007 MHz
SI           32768
SF           100.6228270 MHz
WDW          EM
SSB          0
LB           1.00 Hz
GB           0
PC           1.40
  
```

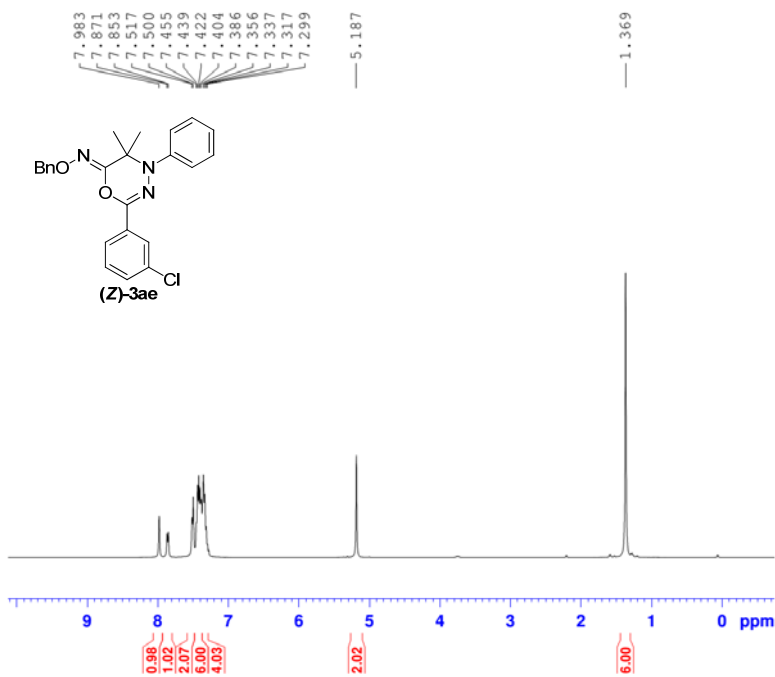

```

NAME          NMR
EXPNO         4676
PROCNO        1
Date_         20161202
Time          10.13
INSTRUM      spect
PROBHD       5 mm PABBO BB-
PULPROG      zg30
TD            65536
SOLVENT      CDCl3
NS            16
DS            2
SWH           8223.685 Hz
FIDRES        0.125483 Hz
AQ            3.9846387 sec
RG            128
DW            60.800 usec
DE            6.50 usec
TE            297.1 K
D1            1.00000000 sec
TD0           1
  
```

```

===== CHANNEL f1 =====
NUC1          1H
P1            14.50 usec
PL1           -2.83 dB
PL1W          16.91636658 W
SFO1          400.1724712 MHz
SI            32768
SF            400.1700000 MHz
WDW           EM
SSB           0
LB            0.30 Hz
GB            0
PC            1.00
  
```

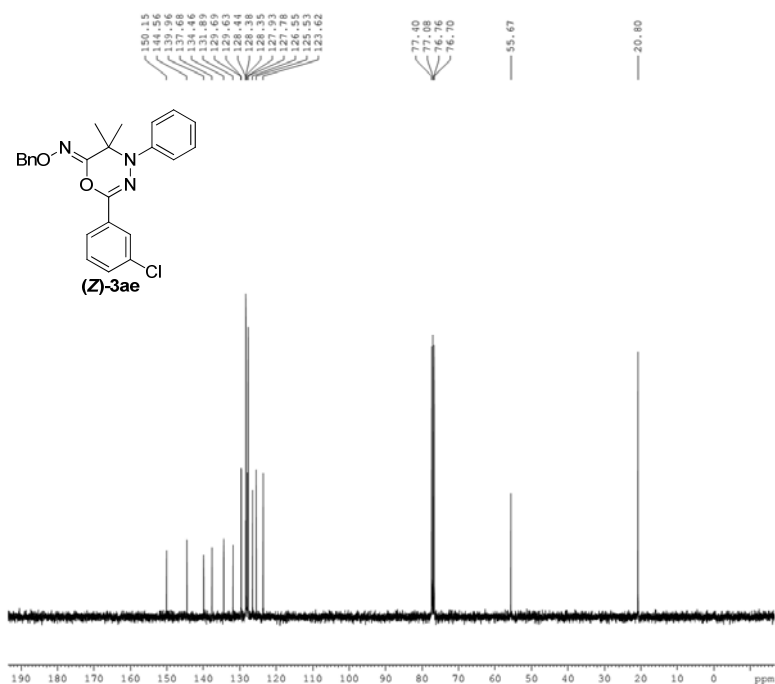

```

NAME          NMR
EXPNO         4677
PROCNO        1
Date_         20161202
Time          10.19
INSTRUM      spect
PROBHD       5 mm PABBO BB-
PULPROG      zgpg30
TD            65536
SOLVENT      CDCl3
NS            64
DS            4
SWH           24038.461 Hz
FIDRES        0.366798 Hz
AQ            1.3631988 sec
RG            724
DW            20.800 usec
DE            6.50 usec
TE            297.4 K
D1            2.00000000 sec
D11           0.03000000 sec
TD0           1
  
```

```

===== CHANNEL f1 =====
NUC1          13C
P1            11.70 usec
PL1           -2.00 dB
PL1W          48.76812744 W
SFO1          100.6328888 MHz

===== CHANNEL f2 =====
CPDPRG2      waltz16
NUC2          1H
PCPD2        80.00 usec
PL2           -2.83 dB
PL12         12.00 dB
PL13         14.00 dB
PL2W         16.91636658 W
PL12W        0.55629748 W
PL13W        0.35100001 W
SFO2         400.1716007 MHz
SI            32768
SF            100.6228270 MHz
WDW           EM
SSB           0
LB            1.00 Hz
GB            0
PC            1.40
  
```

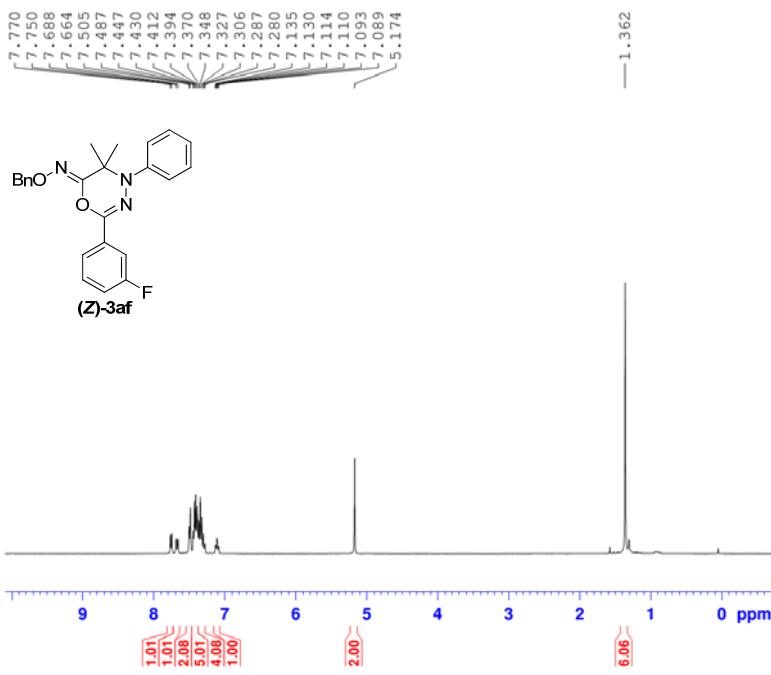

```

NAME          NMR
EXPNO         4749
PROCNO        1
Date_         20170112
Time          16.07
INSTRUM      spect
PROBHD        5 mm PABBO BB-
PULPROG      zg30
TD            65536
SOLVENT      CDCl3
NS            12
DS            2
SWH           8223.685 Hz
FIDRES        0.125483 Hz
AQ            3.9846387 sec
RG            144
DW            60.800 usec
DE            6.50 usec
TE            296.4 K
D1            1.00000000 sec
TD0           1

===== CHANNEL f1 =====
NUC1          1H
P1            14.50 usec
PL1          -2.33 dB
PL1W         16.91636658 W
SFO1         400.1724712 MHz
SI           32768
SF           400.1700000 MHz
WDW          EM
SSB           0
LB            0.30 Hz
GB            0
PC            1.00
  
```

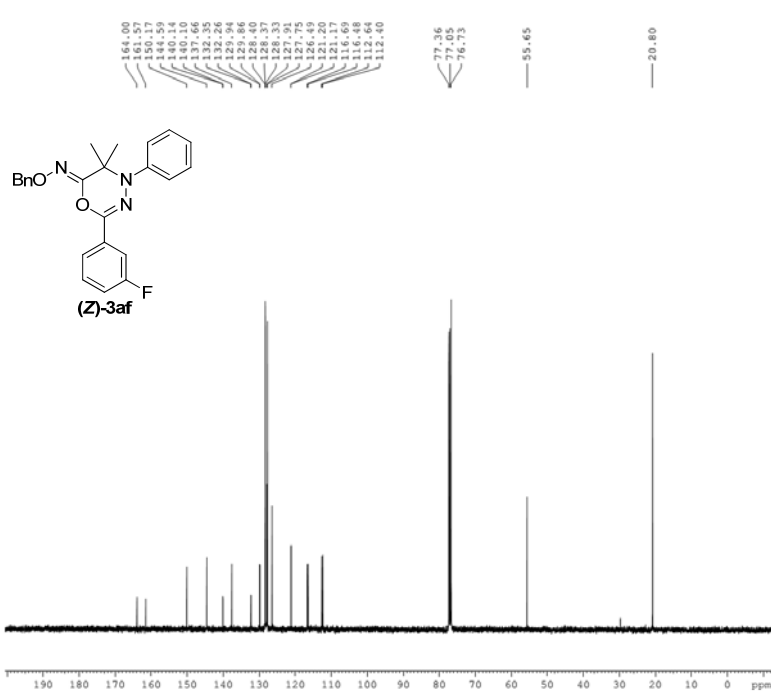

```

NAME          NMR
EXPNO         4748
PROCNO        1
Date_         20170112
Time          14.58
INSTRUM      spect
PROBHD        5 mm PABBO BB-
PULPROG      zgpg30
TD            65536
SOLVENT      CDCl3
NS            256
DS            4
SWH           24038.461 Hz
FIDRES        0.366798 Hz
AQ            1.3631988 sec
RG            812
DW            20.800 usec
DE            6.50 usec
TE            296.5 K
D1            2.00000000 sec
D11           0.03000000 sec
TD0           1

===== CHANNEL f1 =====
NUC1          13C
P1            11.70 usec
PL1          -2.00 dB
PL1W         48.76812744 W
SFO1         100.6228270 MHz

===== CHANNEL f2 =====
CPDPRG2      waltz16
NUC2          1H
PCPD2        80.00 usec
PL2          -2.83 dB
PL12         12.00 dB
PL13         14.00 dB
PL1W         16.91636658 W
PL12W        0.55629748 W
PL13W        0.35100001 W
SFO2         400.1716007 MHz
SI           32768
SF           100.6228270 MHz
WDW          EM
SSB           0
LB            1.00 Hz
GB            0
PC            1.40
  
```

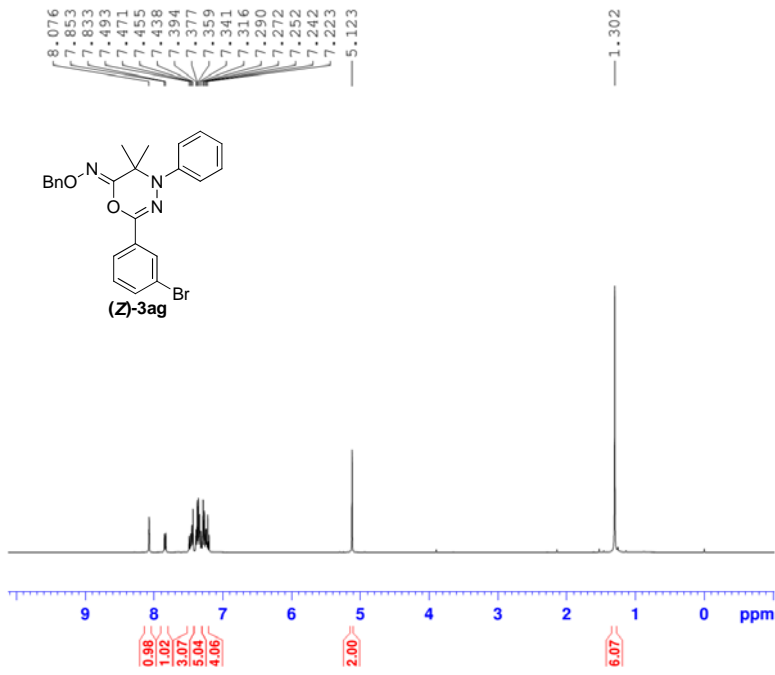

```

NAME          NMR
EXPNO         201739
PROCNO        1
Date_         20170307
Time          23.58 h
INSTRUM       spect
PROBHD        Z116098_0406 (
PULPROG       zg30
TD            65536
SOLVENT       CDCl3
NS            16
DS            2
SWH           8012.820 Hz
FIDRES        0.122266 Hz
AQ            4.0894966 sec
RG            30.91
DW            62.400 usec
DE            6.50 usec
TE            293.5 K
D1            1.00000000 sec
TD0           1
SF01          400.1324708 MHz
NUC1          1H
P1            10.00 usec
SI            65536
SF            400.1300296 MHz
WDW           EM
SSB           0
LB            0.30 Hz
GB            0
PC            1.00
  
```

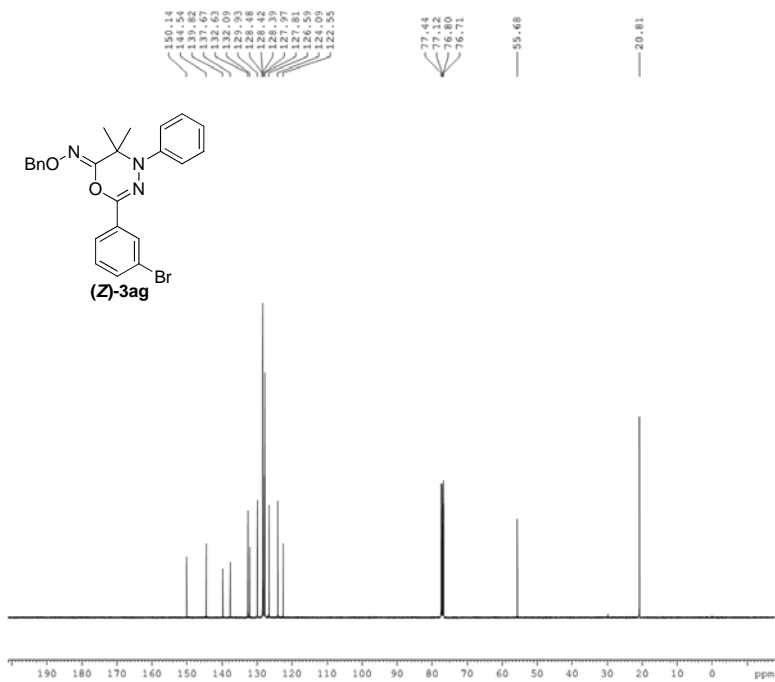

```

NAME          NMR
EXPNO         201740
PROCNO        1
Date_         20170308
Time          0.59 h
INSTRUM       spect
PROBHD        Z116098_0406 (
PULPROG       zgpg30
TD            65536
SOLVENT       CDCl3
NS            1024
DS            4
SWH           24038.461 Hz
FIDRES        0.366798 Hz
AQ            1.3631988 sec
RG            196.12
DW            20.800 usec
DE            6.50 usec
TE            294.2 K
D1            2.00000000 sec
D11           0.03000000 sec
TD0           1
SF01          100.6228298 MHz
NUC1          13C
P1            10.00 usec
SI            32768
SF            100.6127685 MHz
WDW           EM
SSB           0
LB            1.00 Hz
GB            0
PC            1.40
  
```

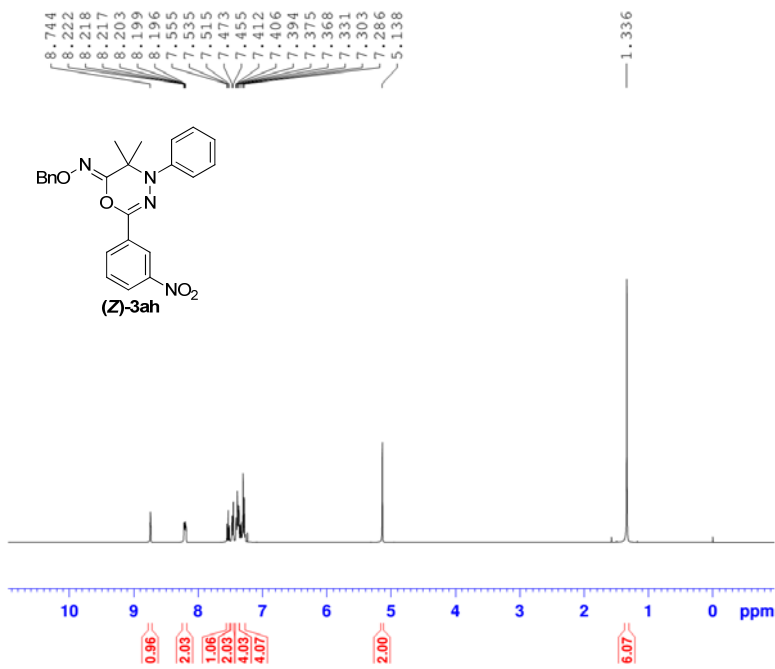

```

NAME          NMR
EXPNO         201741
PROCNO        1
Date_         20170307
Time          20.31 h
INSTRUM       spect
PROBHD        Z116098_0406 (
PULPROG       zg30
TD            65536
SOLVENT       CDCl3
NS            16
DS            2
SWH           8012.820 Hz
FIDRES        0.122266 Hz
AQ            4.0894966 sec
RG            30.91
DW            62.400 usec
DE            6.50 usec
TE            293.1 K
D1            1.00000000 sec
TD0           1
SF01          400.1324708 MHz
NUC1          1H
P1            10.00 usec
SI            65536
SF            400.1300196 MHz
WDW           EM
SSB           0
LB            0.30 Hz
GB            0
PC            1.00
  
```

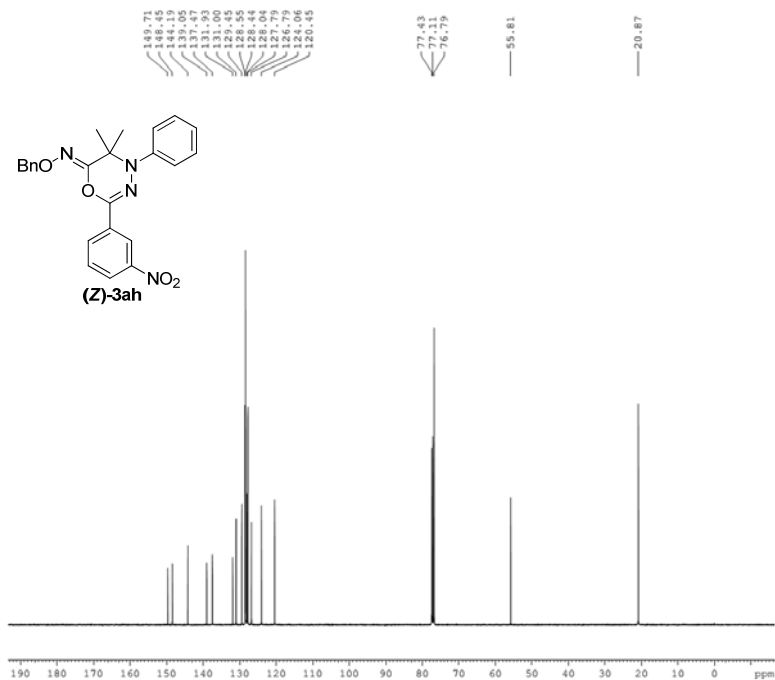

```

NAME          NMR
EXPNO         201710
PROCNO        1
Date_         20170224
Time          23.12 h
INSTRUM       spect
PROBHD        Z116098_0406 (
PULPROG       zgpg30
TD            65536
SOLVENT       CDCl3
NS            1024
DS            4
SWH           24038.461 Hz
FIDRES        0.366798 Hz
AQ            1.3631988 sec
RG            196.12
DW            20.800 usec
DE            6.50 usec
TE            292.8 K
D1            2.00000000 sec
D11           0.03000000 sec
TD0           1
SF01          100.6228298 MHz
NUC1          13C
P1            10.00 usec
SI            32768
SF            100.6127685 MHz
WDW           EM
SSB           0
LB            1.00 Hz
GB            0
PC            1.40
  
```



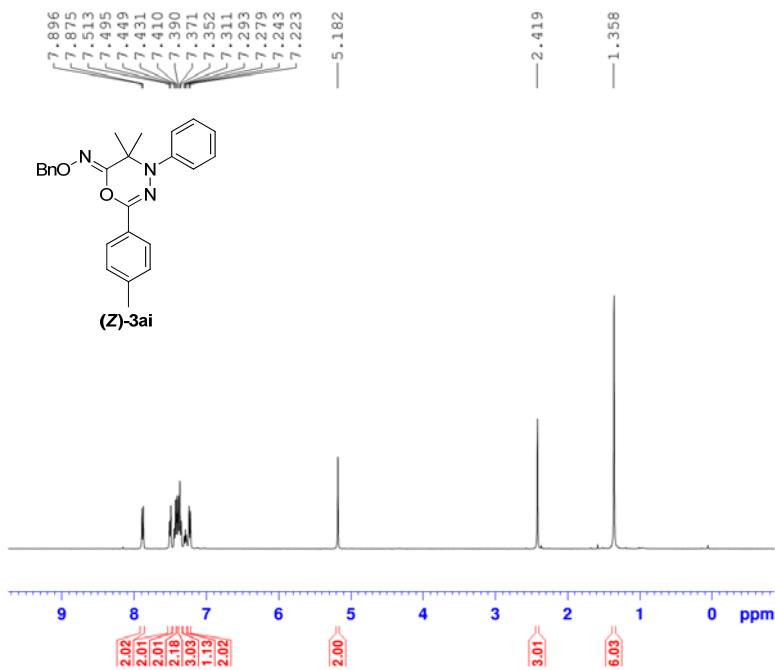

```

NAME          NMR
EXPNO         4728
PROCNO        1
Date_         20161230
Time          16.20
INSTRUM       spect
PROBHD        5 mm PABBO BB-
PULPROG       zg30
TD            65536
SOLVENT       CDCl3
NS            4
DS            2
SWH           8223.685 Hz
FIDRES        0.125483 Hz
AQ            3.9846387 sec
RG            144
DW            60.800 usec
DE            6.50 usec
TE            294.7 K
D1            1.00000000 sec
TDO           1

```

```

===== CHANNEL f1 =====
NUC1          1H
P1            14.50 usec
PL1           -2.83 dB
PL1W          16.91636658 W
SFO1          400.1724712 MHz
SI            32768
SF            400.1700000 MHz
WDW           EM
SSB           0
LB            0.30 Hz
GB            0
PC            1.00

```

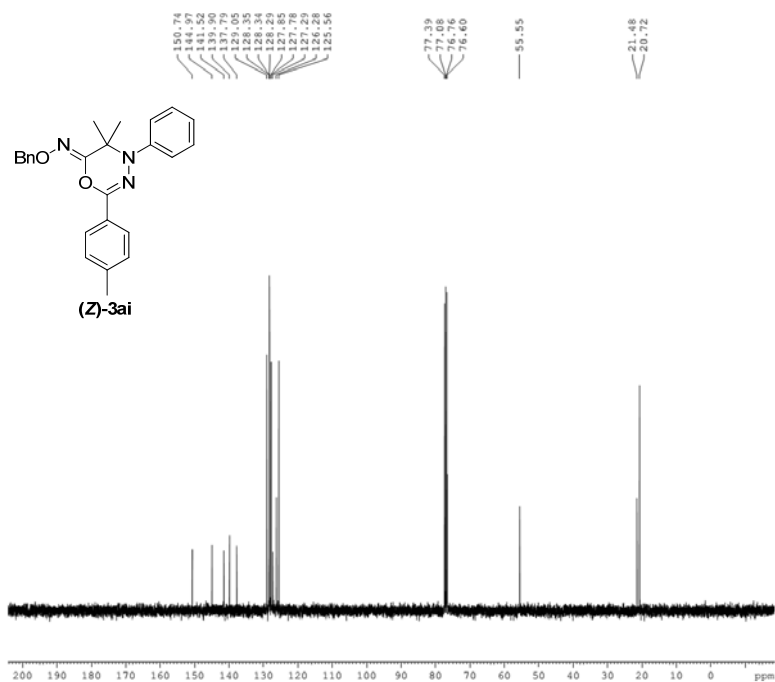

```

NAME          NMR
EXPNO         4727
PROCNO        1
Date_         20161230
Time          16.15
INSTRUM       spect
PROBHD        5 mm PABBO BB-
PULPROG       zgpg30
TD            65536
SOLVENT       CDCl3
NS            32
DS            4
SWH           24038.461 Hz
FIDRES        0.366798 Hz
AQ            1.3631988 sec
RG            1030
DW            20.800 usec
DE            6.50 usec
TE            294.6 K
D1            2.00000000 sec
D11           0.03000000 sec
TDO           1

```

```

===== CHANNEL f1 =====
NUC1          13C
P1            11.70 usec
PL1           -2.00 dB
PL1W          48.76812744 W
SFO1          100.6328888 MHz

```

```

===== CHANNEL f2 =====
CPDPRG2       waltz16
NUC2          1H
PCPD2         80.00 usec
PL2           -2.83 dB
PL12          12.00 dB
PL13          14.00 dB
PL2W          16.91636658 W
PL12W         0.55629748 W
PL13W         0.35100001 W
SFO2          400.1716007 MHz
SI            32768
SF            100.6228270 MHz
WDW           EM
SSB           0
LB            1.00 Hz
GB            0
PC            1.40

```



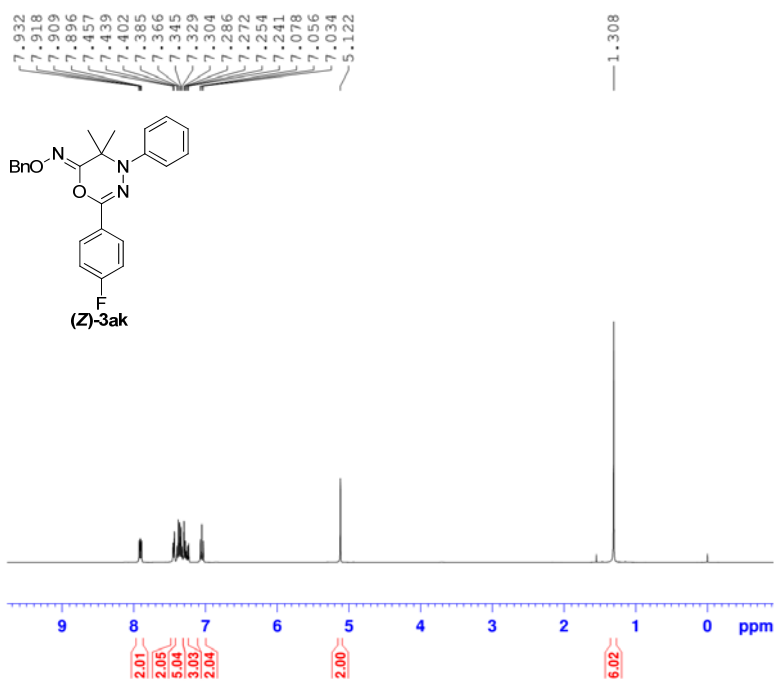

```

NAME          NMR
EXPNO         201703
PROCNO        1
Date_         20170221
Time          22.19 h
INSTRUM       spect
PROBHD        Z116098_0406 (
PULPROG       zg30
TD            65536
SOLVENT       CDCl3
NS            16
DS            2
SWH           8012.820 Hz
FIDRES        0.122266 Hz
AQ            4.0894966 sec
RG            56.71
DW            62.400 usec
DE            6.50 usec
TE            291.2 K
D1            1.00000000 sec
TD0           1
SFO1          400.1324708 MHz
NUC1          1H
P1            10.00 usec
SI            65536
SF            400.1300173 MHz
WDW           EM
SSB           0
LB            0.30 Hz
GB            0
PC            1.00

```

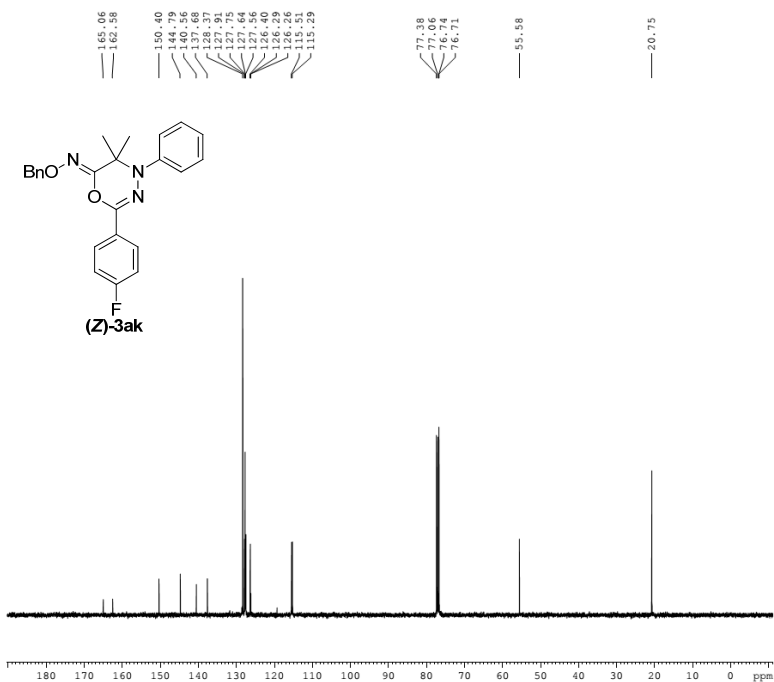

```

NAME          NMR
EXPNO         5262
PROCNO        1
Date_         20171121
Time          10.14
INSTRUM       spect
PROBHD        5 mm PABBO BB-
PULPROG       zgpg30
TD            65536
SOLVENT       CDCl3
NS            153
DS            4
SWH           24038.461 Hz
FIDRES        0.366798 Hz
AQ            1.3631988 sec
RG            2050
DW            20.800 usec
DE            6.50 usec
TE            297.1 K
D1            2.00000000 sec
D11           0.03000000 sec
TD0           1
----- CHANNEL f1 -----
NUC1          13C
P1            11.70 usec
PL1           -2.00 dB
PL1W          48.76812744 W
SFO1          100.6288888 MHz
----- CHANNEL f2 -----
CPDPRG2       waltz16
NUC2          1H
PCPD2         80.00 usec
PL2           -2.83 dB
PL12          12.00 dB
PL13          14.00 dB
PL2W          16.91636658 W
PL12W         0.55629748 W
PL13W         0.35100001 W
SFO2          400.1716007 MHz
SI            32768
SF            100.6228270 MHz
WDW           EM
SSB           0
LB            1.00 Hz
GB            0
PC            1.40

```

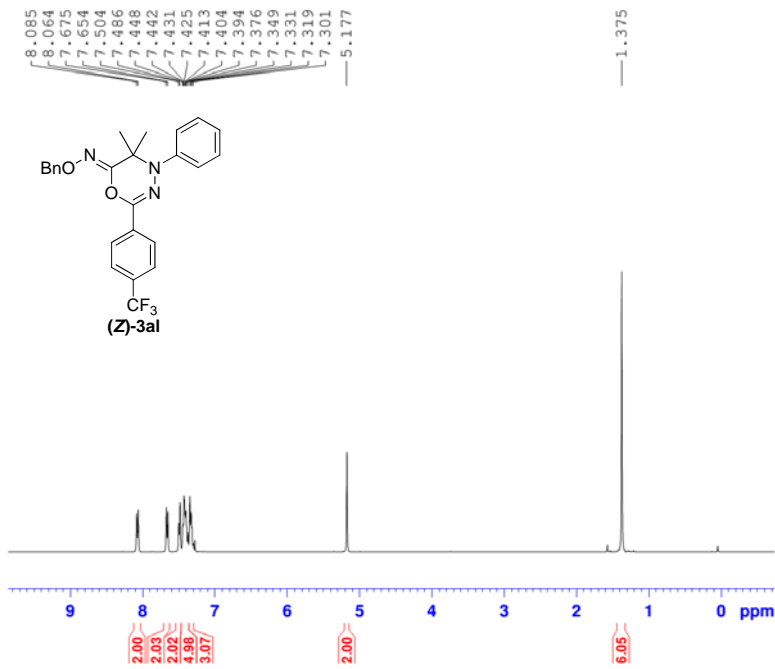

```

NAME          NMR
EXPNO         4746
PROCNO        1
Date_         20170112
Time          14.34
INSTRUM       spect
PROBHD        5 mm PABBO BB-
PULPROG       zg30
TD            65536
SOLVENT       CDCl3
NS            8
DS            2
SWH           8223.685 Hz
FIDRES        0.125483 Hz
AQ            3.9846387 sec
RG            114
DW            60.800 usec
DE            6.50 usec
TE            295.2 K
D1            1.0000000 sec
D11           1
TD0           1
  
```

```

----- CHANNEL f1 -----
NUC1          1H
P1            14.50 usec
PL1           -2.83 dB
PL1W          16.9163658 W
SFO1          400.1724712 MHz
SI            32768
SF            400.1700000 MHz
WDW           EM
SSB           0
LB            0.30 Hz
GB            0
PC            1.00
  
```

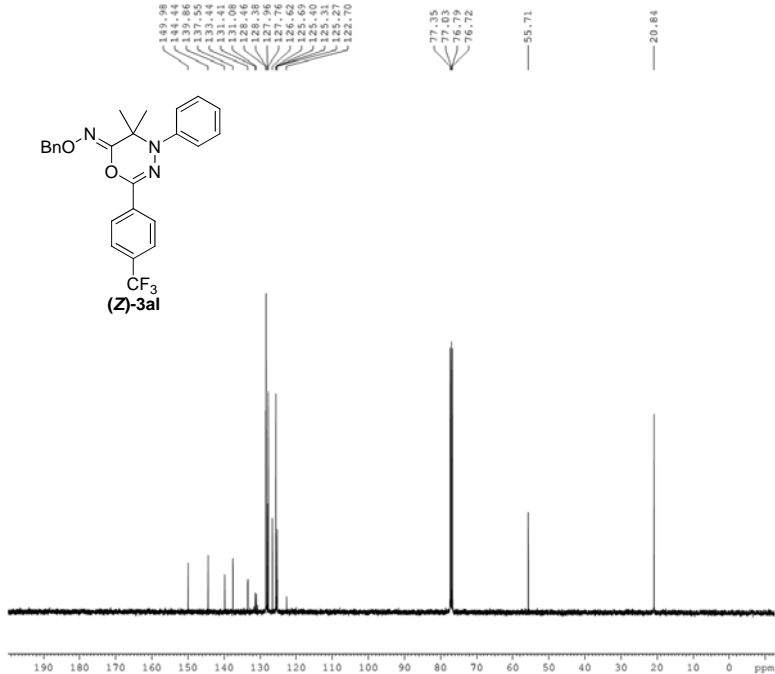

```

NAME          NMR
EXPNO         4747
PROCNO        1
Date_         20170112
Time          14.38
INSTRUM       spect
PROBHD        5 mm PABBO BB-
PULPROG       zgpg30
TD            65536
SOLVENT       CDCl3
NS            212
DS            4
SWH           24038.461 Hz
FIDRES        0.366798 Hz
AQ            1.3631988 sec
RG            812
DW            20.800 usec
DE            6.50 usec
TE            296.2 K
D1            2.0000000 sec
D11           0.0300000 sec
TD0           1
  
```

```

----- CHANNEL f1 -----
NUC1          13C
P1            11.70 usec
PL1           -2.00 dB
PL1W          48.76812744 W
SFO1          100.6228888 MHz

----- CHANNEL f2 -----
CPDPRG2       waltz16
NUC2          1H
PCPD2         80.00 usec
PL2           -2.83 dB
PL12          12.00 dB
PL13          14.00 dB
PL2W          16.9163658 W
PL12W         0.55629748 W
PL13W         0.35100001 W
SFO2          400.1716007 MHz
SI            32768
SF            100.6228270 MHz
WDW           EM
SSB           0
LB            1.00 Hz
GB            0
PC            1.40
  
```

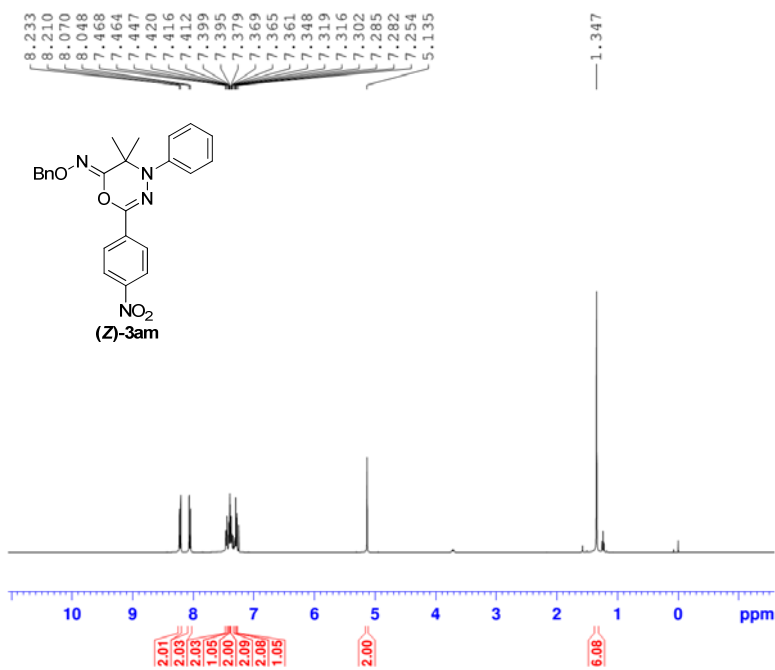

```

NAME          NMR
EXPNO         201701
PROCNO        1
Date_         20170221
Time          20.53 h
INSTRUM      spect
PROBHD       Z116098_0406 (
PULPROG      zg30
TD            65536
SOLVENT      CDCl3
NS            16
DS            2
SWH           8012.820 Hz
FIDRES        0.122266 Hz
AQ            4.0894966 sec
RG            71.01
DW            62.400 usec
DE            6.50 usec
TE            290.7 K
D1            1.00000000 sec
TD0           1
SF01          400.1324708 MHz
NUC1          1H
P1            10.00 usec
SI            65536
SF            400.1300122 MHz
WDW           EM
SSB           0
LB            0.30 Hz
GB            0
PC            1.00
  
```

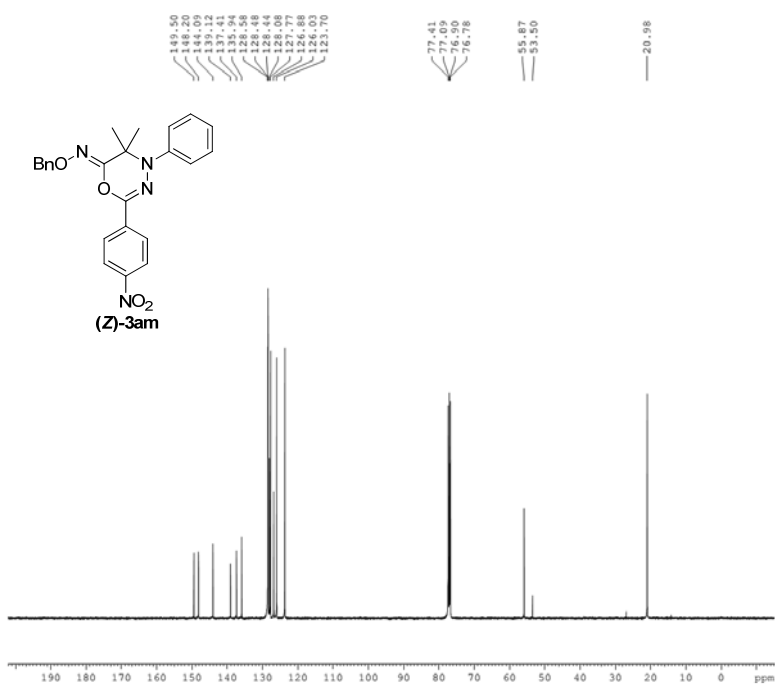

```

NAME          NMR
EXPNO         201713
PROCNO        1
Date_         20170301
Time          13.35 h
INSTRUM      spect
PROBHD       Z116098_0406 (
PULPROG      zgpg30
TD            65536
SOLVENT      CDCl3
NS            1024
DS            4
SWH           24038.461 Hz
FIDRES        0.366798 Hz
AQ            1.3631988 sec
RG            196.12
DW            20.800 usec
DE            6.50 usec
TE            294.0 K
D1            2.00000000 sec
D11           0.03000000 sec
TD0           1
SF01          100.6228298 MHz
NUC1          13C
P1            10.00 usec
SI            32768
SF            100.6127685 MHz
WDW           EM
SSB           0
LB            1.00 Hz
GB            0
PC            1.40
  
```

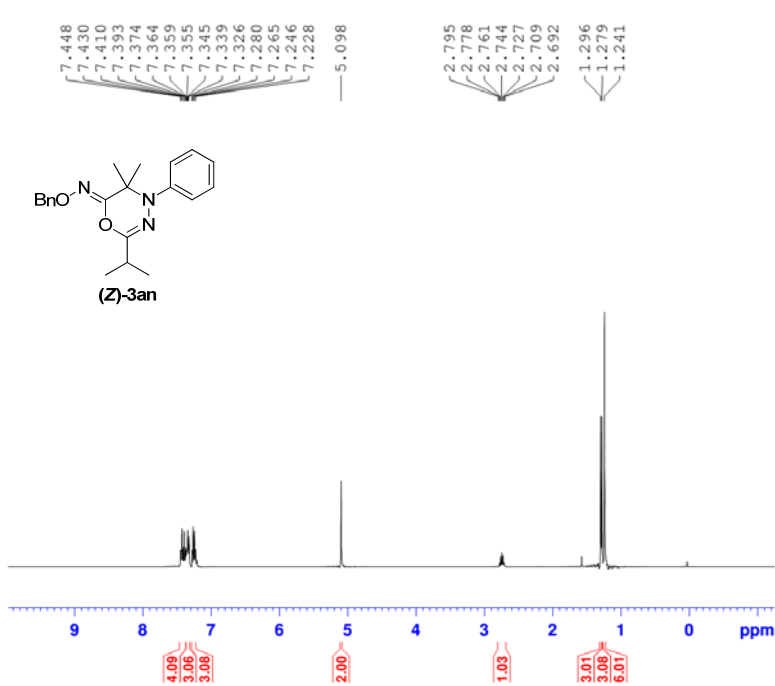

```

NAME      NMR
EXPNO    4716
PROCNO   1
Date_    20161228
Time     14.13
INSTRUM  spect
PROBHD   5 mm PABBO BB-
PULPROG  zg30
TD        65536
SOLVENT  CDCl3
NS        5
DS        2
SWH      8223.685 Hz
FIDRES   0.125483 Hz
AQ        3.9846387 sec
RG        114
DW        60.800 usec
DE        6.50 usec
TE        673.2 K
D1        1.00000000 sec
TDO       1

```

```

===== CHANNEL f1 =====
NUC1     1H
P1       14.50 usec
PL1      -2.32 dB
PL1W     16.91636658 W
SFO1     400.1724712 MHz
SI       32768
SF       400.1700000 MHz
WDW      EM
SSB      0
LB       0.30 Hz
GB       0
PC       1.00

```

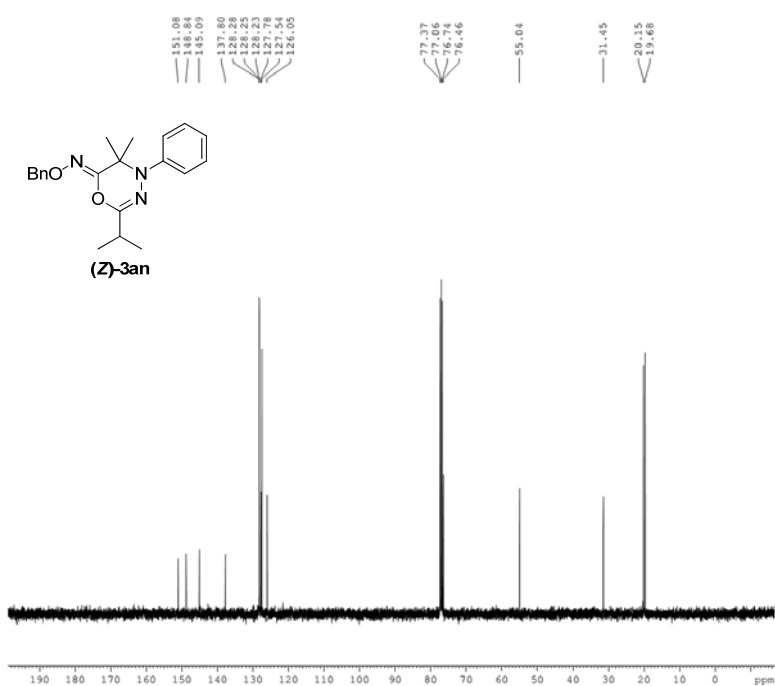

```

NAME      NMR
EXPNO    4722
PROCNO   1
Date_    20161229
Time     17.30
INSTRUM  spect
PROBHD   5 mm PABBO BB-
PULPROG  zgpg30
TD        65536
SOLVENT  CDCl3
NS        52
DS        4
SWH      24038.461 Hz
FIDRES   0.366798 Hz
AQ        1.3631988 sec
RG        812
DW        20.800 usec
DE        6.50 usec
TE        673.2 K
D1        2.00000000 sec
D11      0.03000000 sec
TDO       1

```

```

===== CHANNEL f1 =====
NUC1     13C
P1       11.70 usec
PL1      -2.00 dB
PL1W     48.76812744 W
SFO1     100.6228270 MHz

```

```

===== CHANNEL f2 =====
CPDPRG2  waltz16
NUC2     1H
PCPD2    80.00 usec
PL2      -2.83 dB
PL12     12.00 dB
PL13     14.00 dB
PL2W     16.91636658 W
PL12W    0.55629748 W
PL13W    0.35100001 W
SFO2     400.1716007 MHz
SI       32768
SF       100.6228270 MHz
WDW      EM
SSB      0
LB       1.00 Hz
GB       0
PC       1.40

```

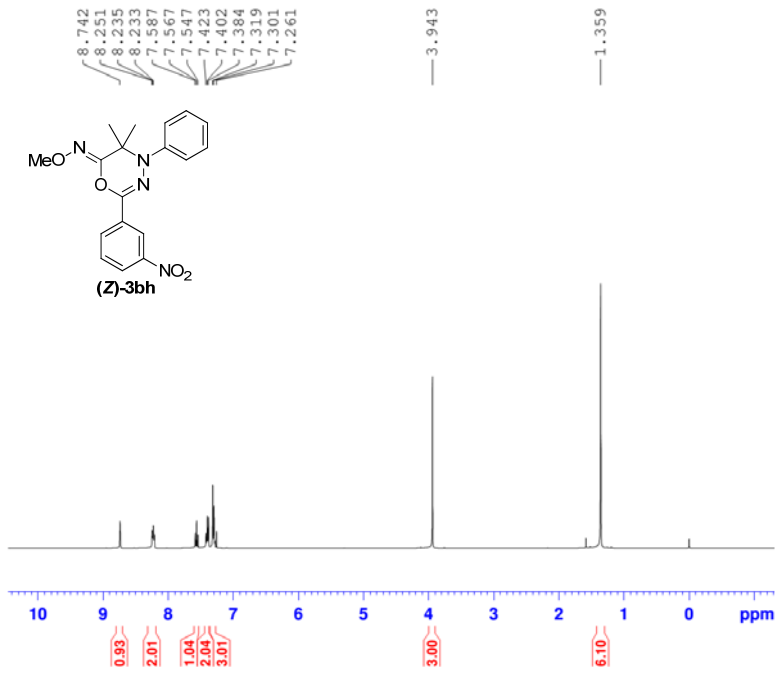

```

NAME      NMR
EXPNO     201715
PROCNO    1
Date_     20170301
Time      12.31 h
INSTRUM   spect
PROBHD    Z116098_0406 (
PULPROG   zg30
TD         65536
SOLVENT   CDCl3
NS         16
DS         2
SWH        8012.820 Hz
FIDRES     0.122266 Hz
AQ         4.0894966 sec
RG         78.23
DW         62.400 usec
DE         6.50 usec
TE         293.5 K
D1         1.00000000 sec
TD0        1
SF01       400.1324708 MHz
NUC1       1H
P1         10.00 usec
SI         65536
SF         400.1300097 MHz
WDW        EM
SSB        0
LB         0.30 Hz
GB         0
PC         1.00
  
```

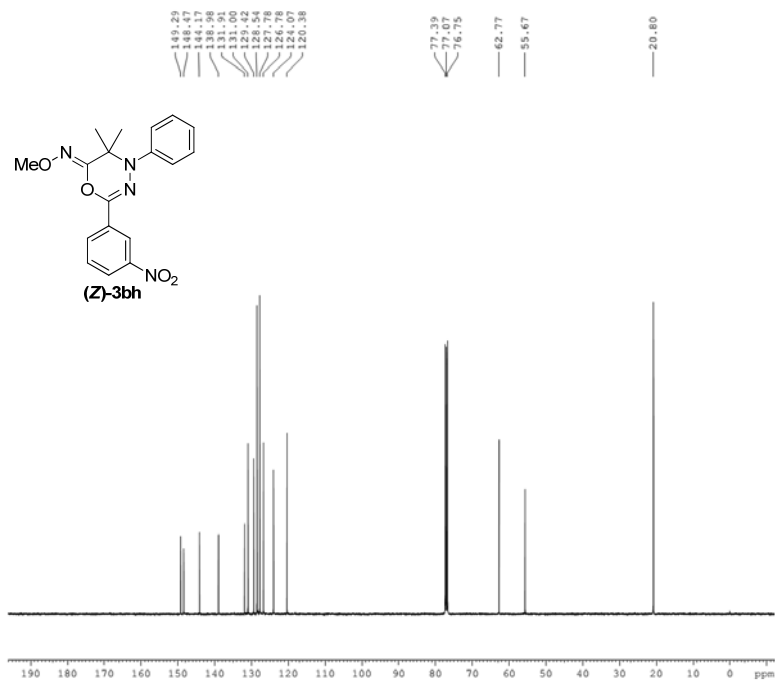

```

NAME      NMR
EXPNO     201746
PROCNO    1
Date_     20170307
Time      21.42 h
INSTRUM   spect
PROBHD    Z116098_0406 (
PULPROG   zgpg30
TD         65536
SOLVENT   CDCl3
NS         1024
DS         4
SWH        24038.461 Hz
FIDRES     0.366798 Hz
AQ         1.3631988 sec
RG         196.12
DW         20.800 usec
DE         6.50 usec
TE         293.9 K
D1         2.00000000 sec
D11        0.03000000 sec
TD0        1
SF01       100.6228298 MHz
NUC1       13C
P1         10.00 usec
SI         32768
SF         100.6127685 MHz
WDW        EM
SSB        0
LB         1.00 Hz
GB         0
PC         1.40
  
```

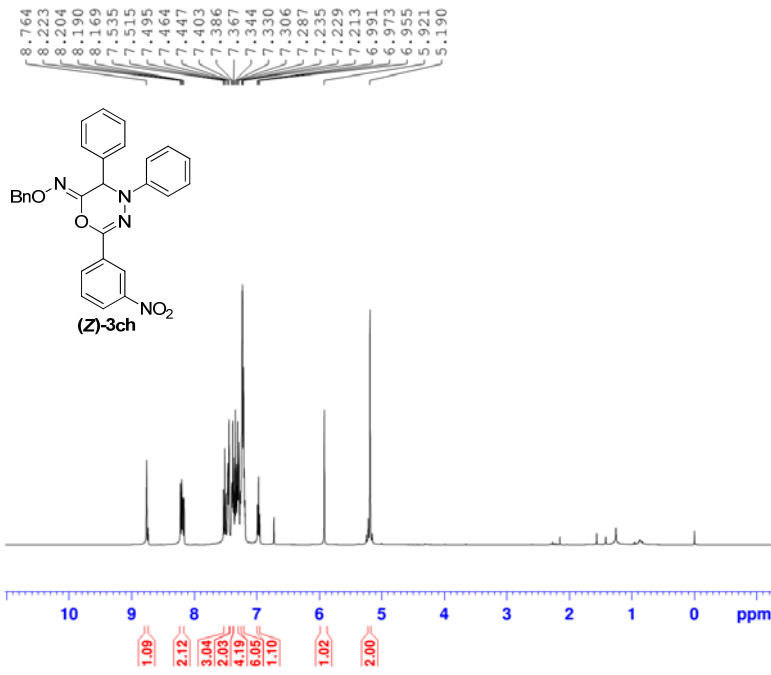

```

NAME          NMR
EXPNO         201742
PROCNO        1
Date_         20170307
Time          21.47 h
INSTRUM       spect
PROBHD        Z116098_0406 (
PULPROG       zg30
TD            65536
SOLVENT       CDCl3
NS            16
DS            2
SWH           8012.820 Hz
FIDRES        0.122266 Hz
AQ            4.0894966 sec
RG            30.91
DW            62.400 usec
DE            6.50 usec
TE            293.4 K
D1            1.00000000 sec
TD0           1
SF01          400.1324708 MHz
NUC1          1H
P1            10.00 usec
SI            65536
SF            400.1300270 MHz
WDW           EM
SSB           0
LB            0.30 Hz
GB            0
PC            1.00
  
```

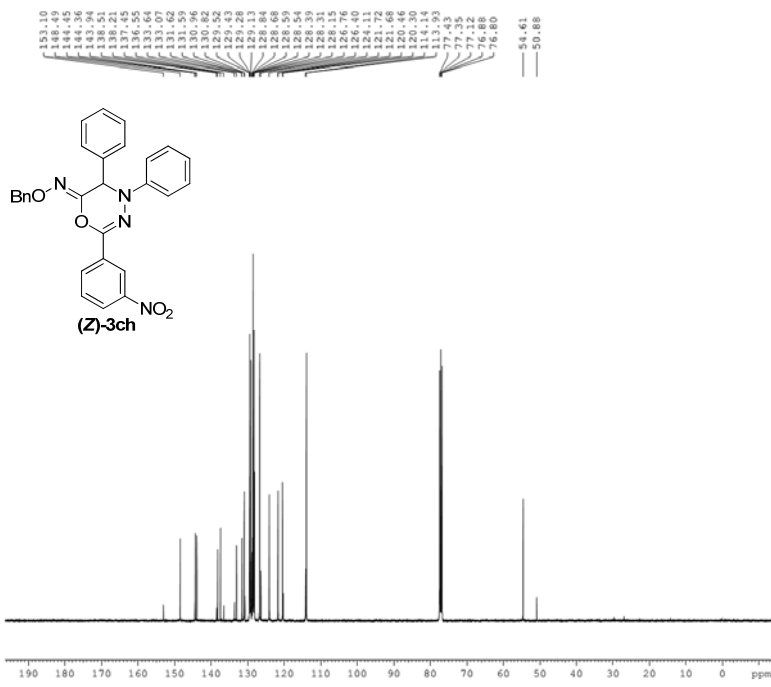

```

NAME          NMR
EXPNO         201743
PROCNO        1
Date_         20170307
Time          22.47 h
INSTRUM       spect
PROBHD        Z116098_0406 (
PULPROG       zgpg30
TD            65536
SOLVENT       CDCl3
NS            1024
DS            4
SWH           24038.461 Hz
FIDRES        0.366798 Hz
AQ            1.3631988 sec
RG            196.12
DW            20.800 usec
DE            6.50 usec
TE            294.1 K
D1            2.00000000 sec
D11           0.03000000 sec
TD0           1
SF01          100.6228298 MHz
NUC1          13C
P1            10.00 usec
SI            32768
SF            100.6127685 MHz
WDW           EM
SSB           0
LB            1.00 Hz
GB            0
PC            1.40
  
```



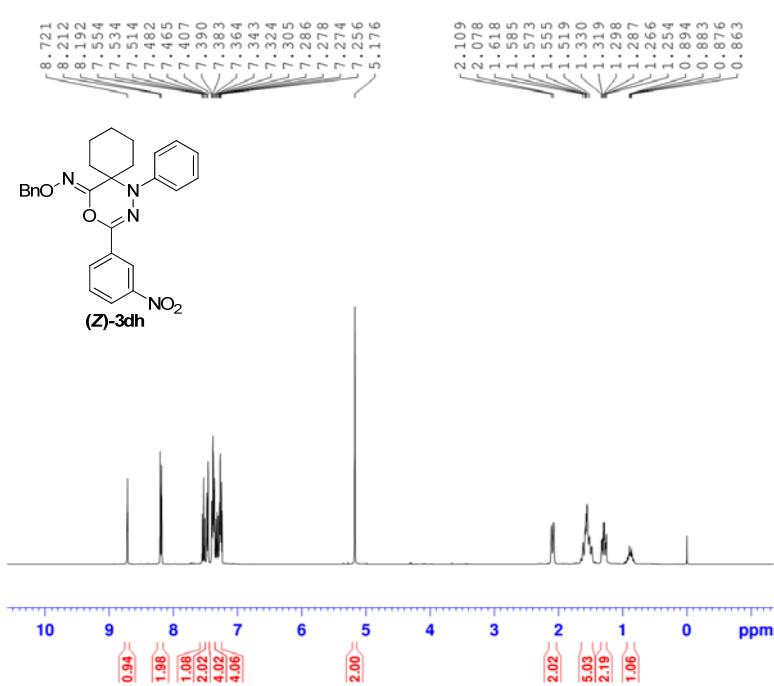

```

NAME          NMR
EXPNO         201744
PROCNO        1
Date_         20170307
Time          18.07 h
INSTRUM       spect
PROBHD        Z116098_0406 (
PULPROG       zg30
TD            65536
SOLVENT       CDCl3
NS            16
DS            2
SWH           8012.820 Hz
FIDRES       0.122266 Hz
AQ           4.0894966 sec
RG           30.91
DW           62.400 usec
DE           6.50 usec
TE           292.0 K
D1           1.00000000 sec
TDO          1
SFO1         400.1324708 MHz
NUC1         1H
P1           10.00 usec
SI           65536
SF           400.1300152 MHz
WDW          EM
SSB          0
LB           0.30 Hz
GB           0
PC           1.00
  
```

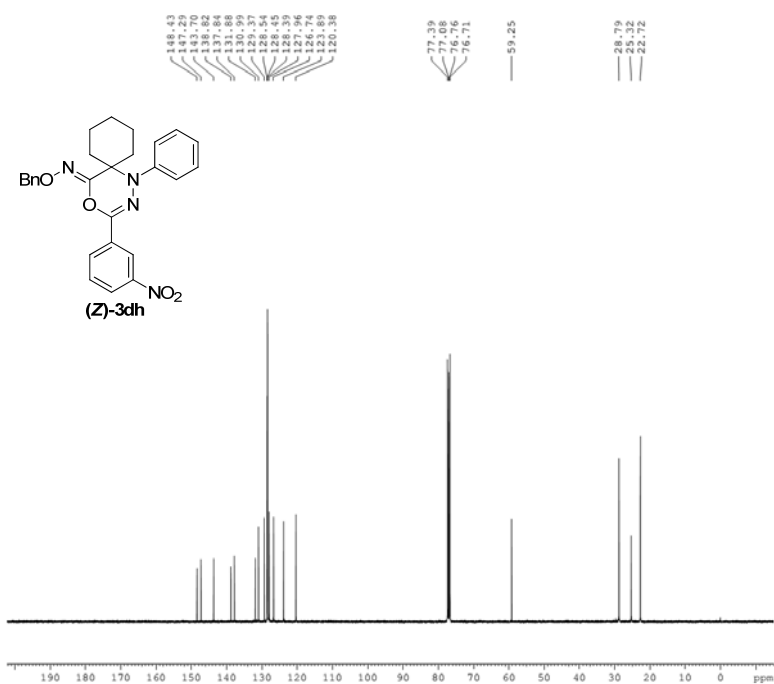

```

NAME          NMR
EXPNO         201745
PROCNO        1
Date_         20170307
Time          19.08 h
INSTRUM       spect
PROBHD        Z116098_0406 (
PULPROG       zgpg30
TD            65536
SOLVENT       CDCl3
NS            1024
DS            4
SWH           24038.461 Hz
FIDRES       0.366798 Hz
AQ           1.3631988 sec
RG           196.12
DW           20.800 usec
DE           6.50 usec
TE           293.4 K
D1           2.00000000 sec
D11          0.03000000 sec
TDO          1
SFO1         100.6228298 MHz
NUC1         13C
P1           10.00 usec
SI           32768
SF           100.6127685 MHz
WDW          EM
SSB          0
LB           1.00 Hz
GB           0
PC           1.40
  
```

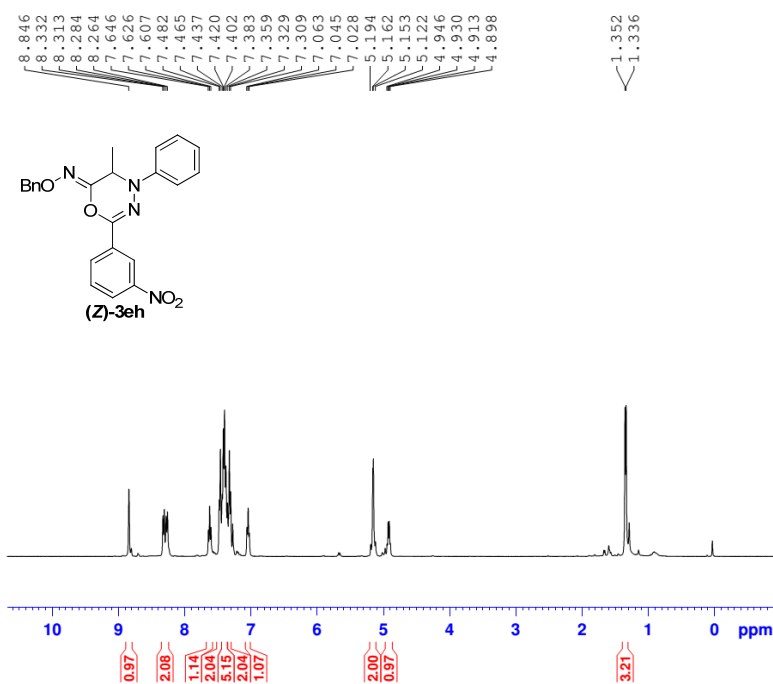

```

NAME          NMR
EXPNO         5645
PROCNO        1
Date_         20171127
Time          9.25
INSTRUM       spect
PROBHD        5 mm PABBO BB-
PULPROG       zg30
TD            65536
SOLVENT       CDCl3
NS            16
DS            2
SWH           8223.685 Hz
FIDRES        0.125483 Hz
AQ            3.9846387 sec
RG            128
DW            60.800 usec
DE            6.50 usec
TE            296.4 K
D1            1.00000000 sec
TD0           1
  
```

```

----- CHANNEL f1 -----
NUC1          1H
P1            14.50 usec
PL1           -2.83 dB
PL1W          16.91636658 W
SFO1          400.1724712 MHz
SI            32768
SF            400.1700000 MHz
WDW           EM
SSB           0
LB            0.30 Hz
GB            0
PC            1.00
  
```

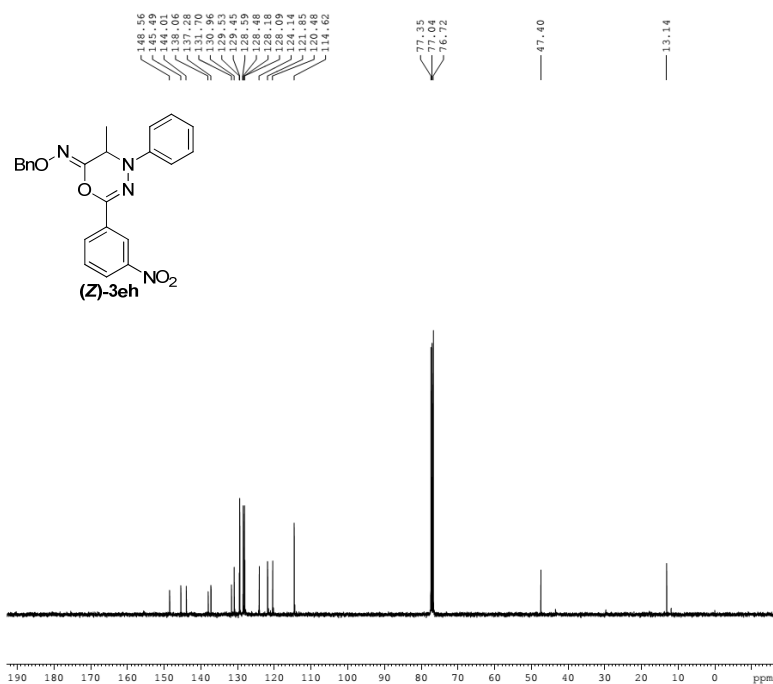

```

NAME          NMR
EXPNO         5646
PROCNO        1
Date_         20171127
Time          9.30
INSTRUM       spect
PROBHD        5 mm PABBO BB-
PULPROG       zgpg30
TD            65536
SOLVENT       CDCl3
NS            385
DS            4
SWH           24038.461 Hz
FIDRES        0.366798 Hz
AQ            1.3631988 sec
RG            2050
DW            20.800 usec
DE            6.50 usec
TE            296.5 K
D1            2.00000000 sec
D11           0.03000000 sec
TD0           1
  
```

```

----- CHANNEL f1 -----
NUC1          13C
P1            11.70 usec
PL1           -2.00 dB
PL1W          48.76812744 W
SFO1          100.6228270 MHz
  
```

```

----- CHANNEL f2 -----
CPDPRG2       waltz16
NUC2          1H
PCPD2         80.00 usec
PL2           -2.83 dB
PL12          12.00 dB
PL13          14.00 dB
PL2W          16.91636658 W
PL12W         0.55629748 W
PL13W         0.35100001 W
SFO2          400.1716007 MHz
SI            32768
SF            100.6228270 MHz
WDW           EM
SSB           0
LB            1.00 Hz
GB            0
PC            1.40
  
```

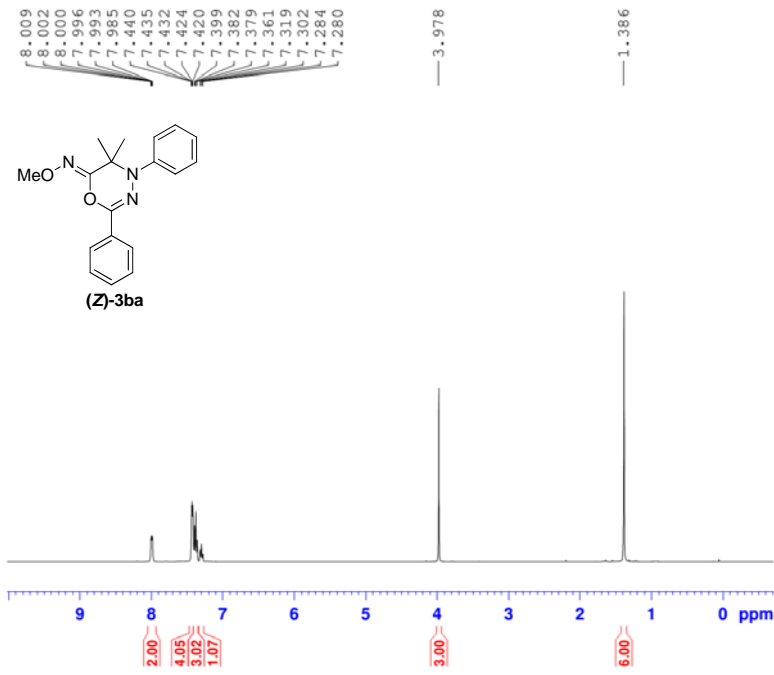

```

NAME          NMR
EXPNO         4696
PROCNO        1
Date_         20161216
Time          9.51
INSTRUM      spect
PROBHD       5 mm PABBO BB-
PULPROG      zg30
TD            65536
SOLVENT      CDCl3
NS            16
DS            2
SWH           8223.685 Hz
FIDRES       0.125483 Hz
AQ            3.9846387 sec
RG            90.5
DW            60.800 usec
DE            6.50 usec
TE            673.2 K
D1            1.00000000 sec
TD0           1
  
```

```

===== CHANNEL f1 =====
NUC1          1H
P1            14.50 usec
PL1           -2.32 dB
PL1W         16.91636658 W
SF01         400.1724712 MHz
SI            32768
SF           400.1700000 MHz
WDW           EM
SSB           0
LB            0.30 Hz
GB            0
PC            1.00
  
```

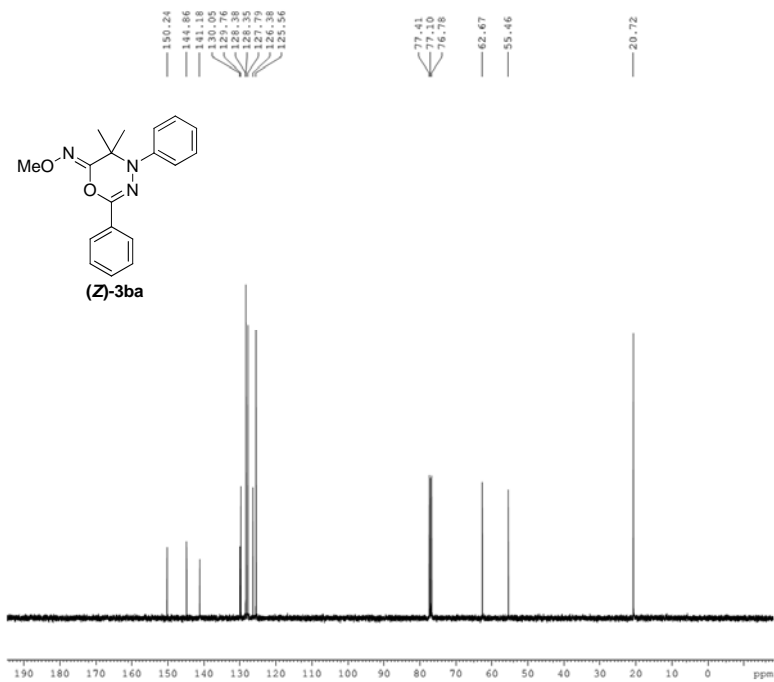

```

NAME          NMR
EXPNO         4699
PROCNO        1
Date_         20161219
Time          13.58
INSTRUM      spect
PROBHD       5 mm PABBO BB-
PULPROG      zgpg30
TD            65536
SOLVENT      CDCl3
NS            38
DS            4
SWH           24038.461 Hz
FIDRES       0.366798 Hz
AQ            1.3631988 sec
RG            1440
DW            20.800 usec
DE            6.50 usec
TE            296.1 K
D1            2.00000000 sec
D11           0.03000000 sec
TD0           1
  
```

```

===== CHANNEL f1 =====
NUC1          13C
P1            11.70 usec
PL1           -2.00 dB
PL1W         48.76812744 W
SF01         100.6328888 MHz
  
```

```

===== CHANNEL f2 =====
CPDPRG2      waltz16
NUC2          1H
PCPD2        80.00 usec
PL2           -2.83 dB
PL12         12.00 dB
PL13         14.00 dB
PL2W         16.91636658 W
PL12W        0.55629748 W
PL13W        0.35100001 W
SF02         400.1716007 MHz
SI            32768
SF           100.6228270 MHz
WDW           EM
SSB           0
LB            1.00 Hz
GB            0
PC            1.40
  
```

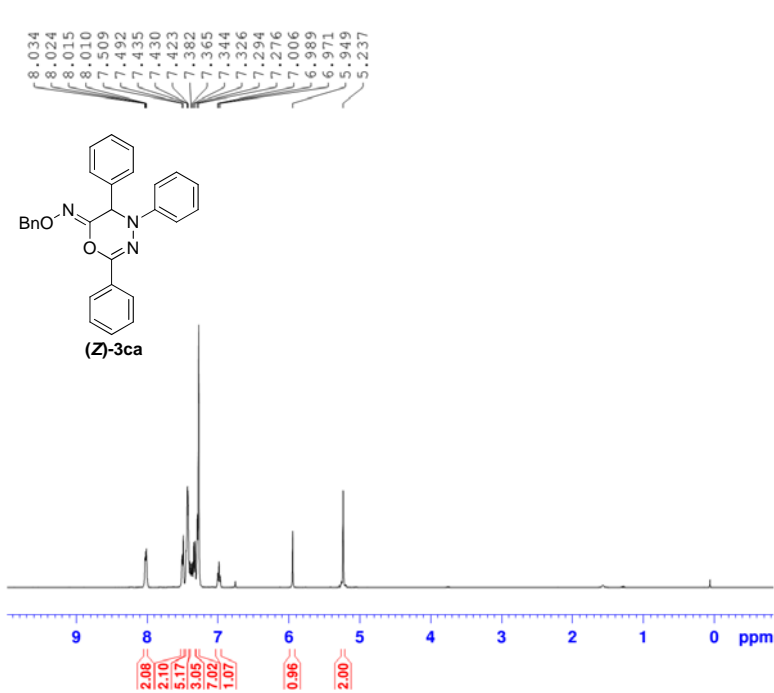

```

NAME          NMR
EXPNO         4697
PROCNO        1
Date_         20161219
Time         13.46
INSTRUM       spect
PROBHD        5 mm PABBO BB-
PULPROG       zg30
TD            65536
SOLVENT       CDCl3
NS            6
DS            2
SWH           8223.685 Hz
FIDRES        0.125483 Hz
AQ            3.9846387 sec
RG            90.5
DW            60.800 usec
DE            6.50 usec
TE            295.4 K
D1            1.00000000 sec
TDO           1

```

```

===== CHANNEL f1 =====
NUC1          1H
P1            14.50 usec
PL1           -2.83 dB
PL1W         16.91636658 W
SFO1         400.1724712 MHz
SI           32768
SF           400.1700000 MHz
WDW           EM
SSB           0
LB            0.30 Hz
GB            0
PC            1.00

```

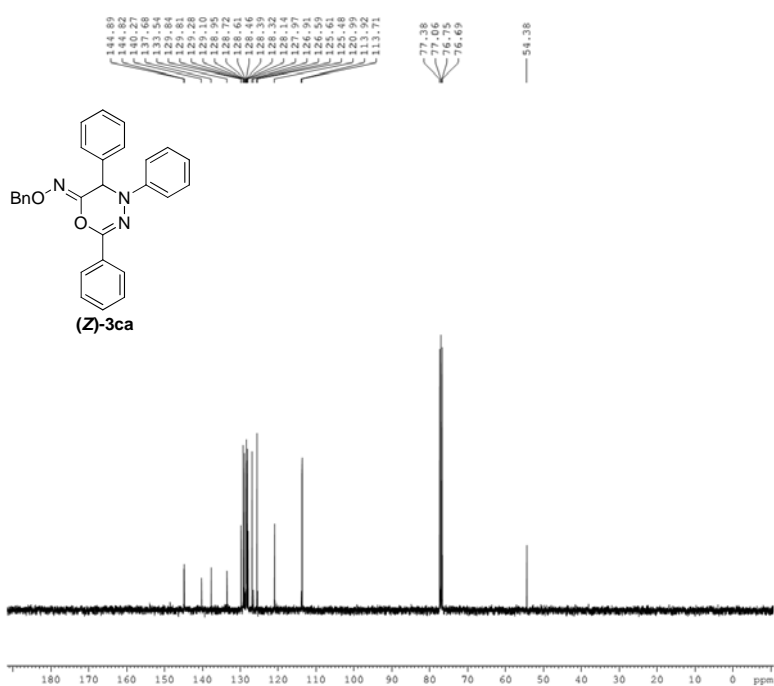

```

NAME          NMR
EXPNO         4698
PROCNO        1
Date_         20161219
Time         13.49
INSTRUM       spect
PROBHD        5 mm PABBO BB-
PULPROG       zgpg30
TD            65536
SOLVENT       CDCl3
NS            65
DS            4
SWH           24038.461 Hz
FIDRES        0.366798 Hz
AQ            1.3631988 sec
RG            1030
DW            20.800 usec
DE            6.50 usec
TE            295.6 K
D1            2.00000000 sec
D11           0.03000000 sec
TDO           1

```

```

===== CHANNEL f1 =====
NUC1          13C
P1            11.70 usec
PL1           -2.00 dB
PL1W         48.76812744 W
SFO1         100.6228270 MHz

```

```

===== CHANNEL f2 =====
CPDPRG2      waltz16
NUC2          1H
PCPD2        80.00 usec
PL2           -2.83 dB
PL12         12.00 dB
PL13         14.00 dB
PL2W         16.91636658 W
PL12W        0.55629748 W
PL13W        0.35100001 W
SFO2         400.1716007 MHz
SI           32768
SF           100.6228270 MHz
WDW           EM
SSB           0
LB            1.00 Hz
GB            0
PC            1.40

```



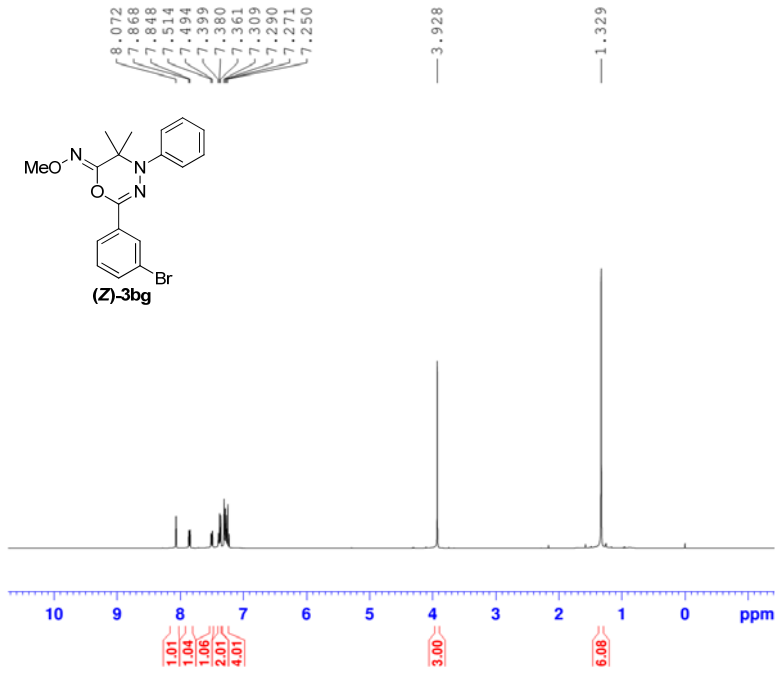

```

NAME          NMR
EXPNO         201737
PROCNO        1
Date_         20170307
Time          19.19 h
INSTRUM       spect
PROBHD        Z116098_0406 (
PULPROG       zg30
TD            65536
SOLVENT       CDCl3
NS            16
DS            2
SWH           8012.820 Hz
FIDRES        0.122266 Hz
AQ            4.0894966 sec
RG            50.56
DW            62.400 usec
DE            6.50 usec
TE            292.8 K
D1            1.00000000 sec
TD0           1
SF01          400.1324708 MHz
NUC1          1H
P1            10.00 usec
SI            65536
SF            400.1300140 MHz
WDW           EM
SSB           0
LB            0.30 Hz
GB            0
PC            1.00

```

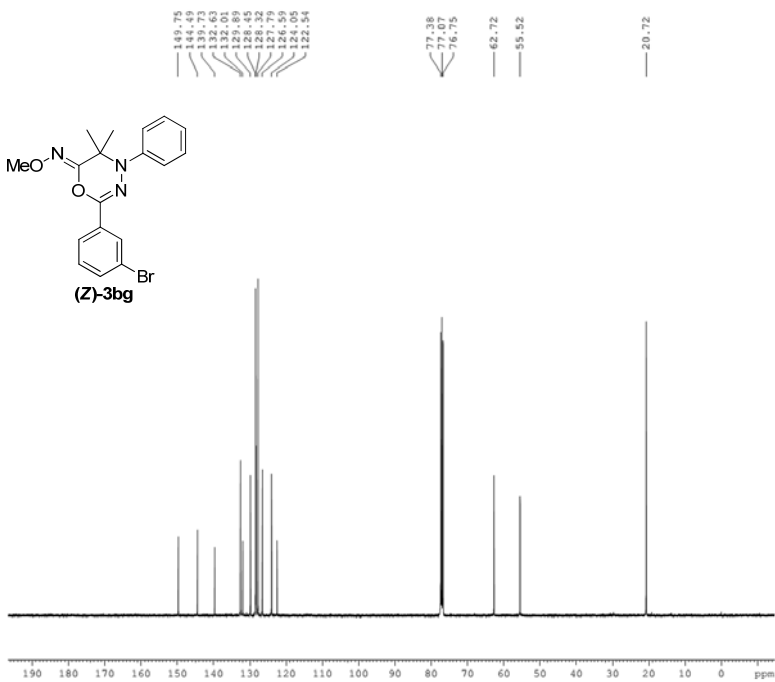

```

NAME          NMR
EXPNO         201738
PROCNO        1
Date_         20170307
Time          20.19 h
INSTRUM       spect
PROBHD        Z116098_0406 (
PULPROG       zgpg30
TD            65536
SOLVENT       CDCl3
NS            1024
DS            4
SWH           24038.461 Hz
FIDRES        0.366798 Hz
AQ            1.3631988 sec
RG            196.12
DW            20.800 usec
DE            6.50 usec
TE            293.7 K
D1            2.00000000 sec
D11           0.03000000 sec
TD0           1
SF01          100.6228298 MHz
NUC1          13C
P1            10.00 usec
SI            32768
SF            100.6127685 MHz
WDW           EM
SSB           0
LB            1.00 Hz
GB            0
PC            1.40

```

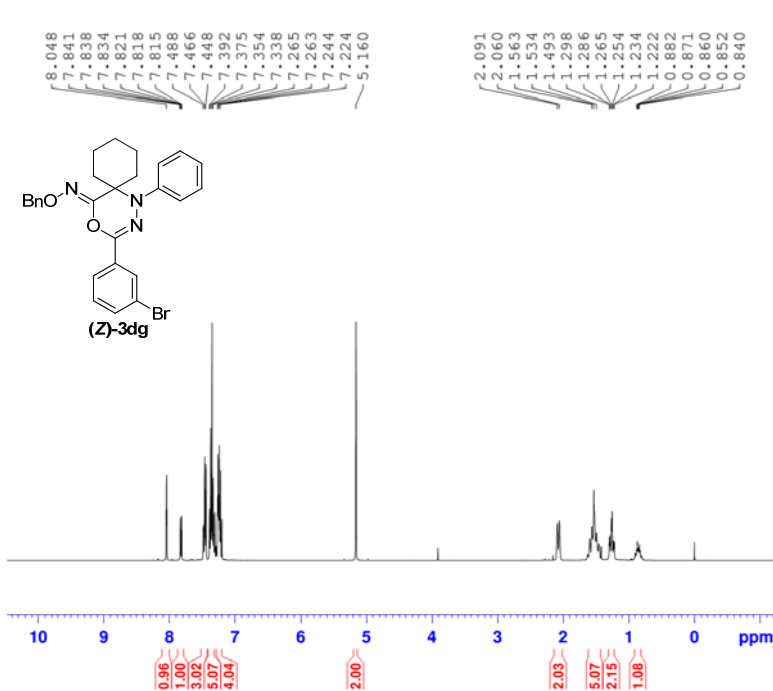

```

NAME          NMR
EXPNO         201735
PROCNO        1
Date_         20170307
Time          22.53 h
INSTRUM       spect
PROBHD        Z116098_0406 (
PULPROG       zg30
TD            65536
SOLVENT       CDCl3
NS            16
DS            2
SWH           8012.820 Hz
FIDRES        0.122266 Hz
AQ            4.0894966 sec
RG            30.91
DW            62.400 usec
DE            6.50 usec
TE            293.5 K
D1            1.00000000 sec
TD0           1
SFO1          400.1324705 MHz
NUC1          1H
P1            10.00 usec
SI            65536
SF            400.1300218 MHz
WDW           EM
SSB           0
LB            0.30 Hz
GB            0
PC            1.00
  
```

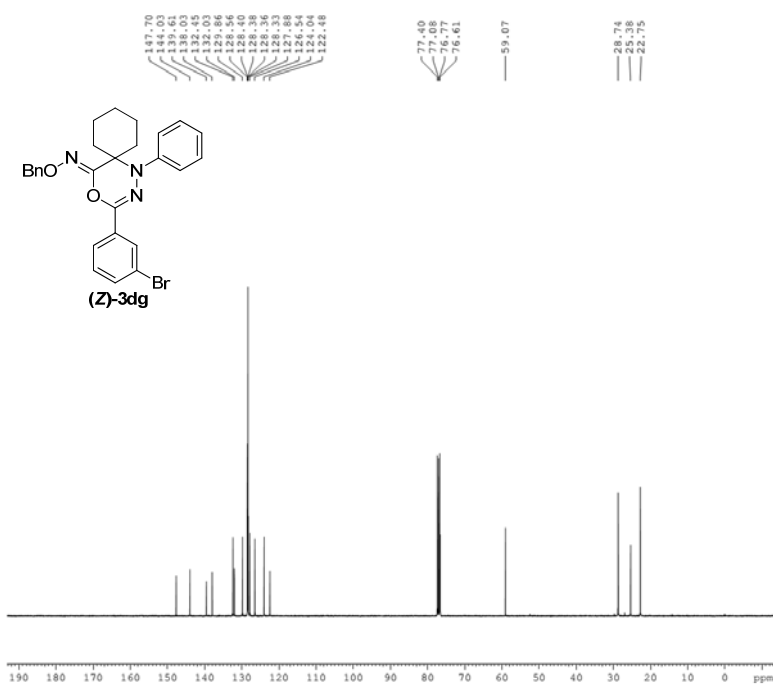

```

NAME          NMR
EXPNO         201736
PROCNO        1
Date_         20170307
Time          23.53 h
INSTRUM       spect
PROBHD        Z116098_0406 (
PULPROG       zgpg30
TD            65536
SOLVENT       CDCl3
NS            1024
DS            4
SWH           24038.461 Hz
FIDRES        0.366798 Hz
AQ            1.3631988 sec
RG            196.12
DW            20.800 usec
DE            6.50 usec
TE            294.1 K
D1            2.00000000 sec
D11           0.03000000 sec
TD0           1
SFO1          100.6228298 MHz
NUC1          13C
P1            10.00 usec
SI            32768
SF            100.6127685 MHz
WDW           EM
SSB           0
LB            1.00 Hz
GB            0
PC            1.40
  
```

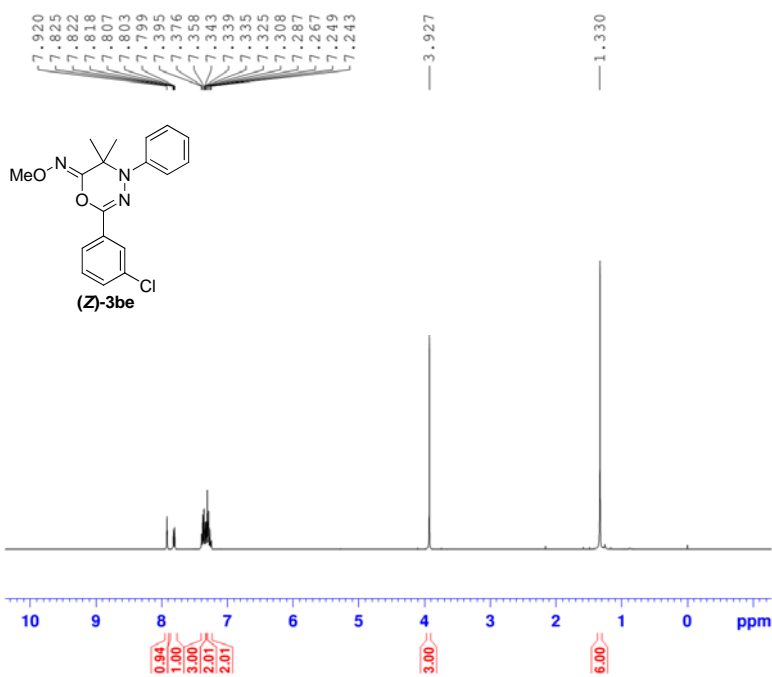

```

NAME          NMR
EXPNO         201729
PROCNO        1
Date_         20170308
Time          2.10 h
INSTRUM       spect
PROBHD        Z116098_0406 (
PULPROG       zg30
TD            65536
SOLVENT       CDCl3
NS            16
DS            2
SWH           8012.520 Hz
FIDRES        0.122266 Hz
AQ            4.0894966 sec
RG            30.91
DW            62.400 usec
DE            6.50 usec
TE            293.7 K
D1            1.00000000 sec
TD0           1
SF01          400.1324708 MHz
NUC1          1H
P1            10.00 usec
SI            65536
SF            400.1300166 MHz
WDW           EM
SSB           0
LB            0.30 Hz
GB            0
PC            1.00
  
```

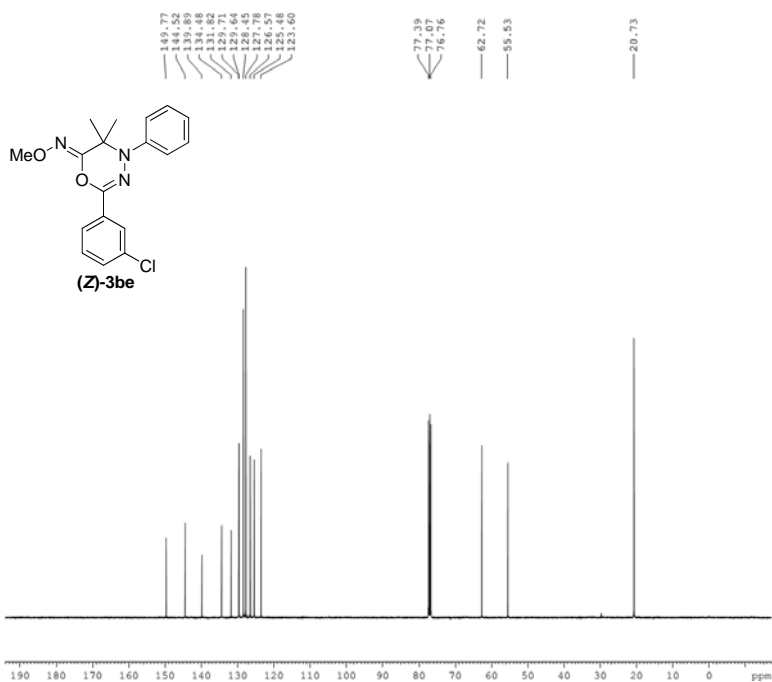

```

NAME          NMR
EXPNO         201730
PROCNO        1
Date_         20170308
Time          3.11 h
INSTRUM       spect
PROBHD        Z116098_0406 (
PULPROG       zgpg30
TD            65536
SOLVENT       CDCl3
NS            1024
DS            4
SWH           24038.461 Hz
FIDRES        0.366798 Hz
AQ            1.3631988 sec
RG            196.12
DW            20.800 usec
DE            6.50 usec
TE            294.4 K
D1            2.00000000 sec
D11           0.03000000 sec
TD0           1
SF01          100.6228298 MHz
NUC1          13C
P1            10.00 usec
SI            32768
SF            100.6127685 MHz
WDW           EM
SSB           0
LB            1.00 Hz
GB            0
PC            1.40
  
```



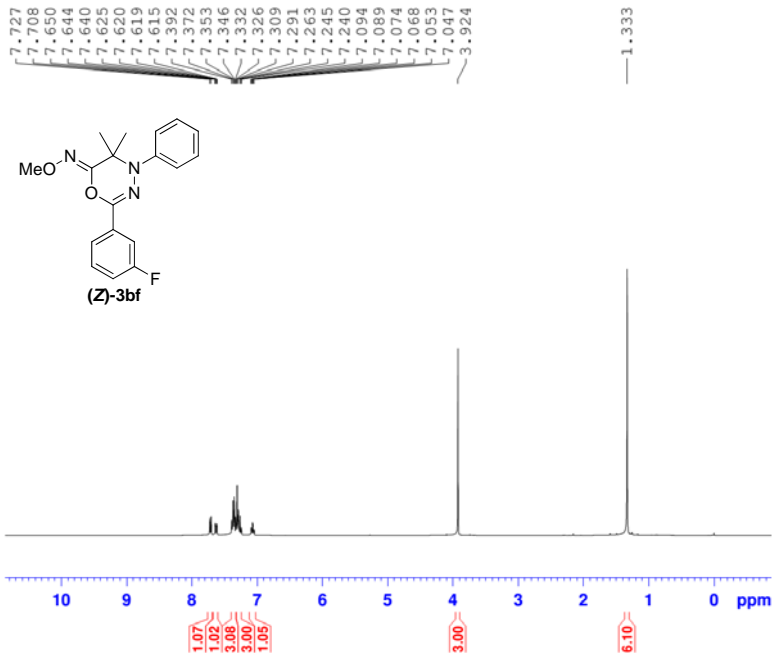

```

NAME      NMR
EXPNO     201731
PROCNO    1
Date_     20170308
Time      1.05 h
INSTRUM   spect
PROBHD    Z116098_0406 (
PULPROG   zgpg30
TD        65536
SOLVENT   CDCl3
NS         16
DS         2
SWH        8012.820 Hz
FIDRES     0.122266 Hz
AQ         4.0894966 sec
RG         30.91
DW         62.400 usec
DE         6.50 usec
TE         293.6 K
D1         1.00000000 sec
TD0        1
SFO1       400.1324708 MHz
NUC1       1H
P1         10.00 usec
SI         65536
SF         400.1300179 MHz
WDW        EM
SSB        0
LB         0.30 Hz
GB         0
PC         1.00
  
```

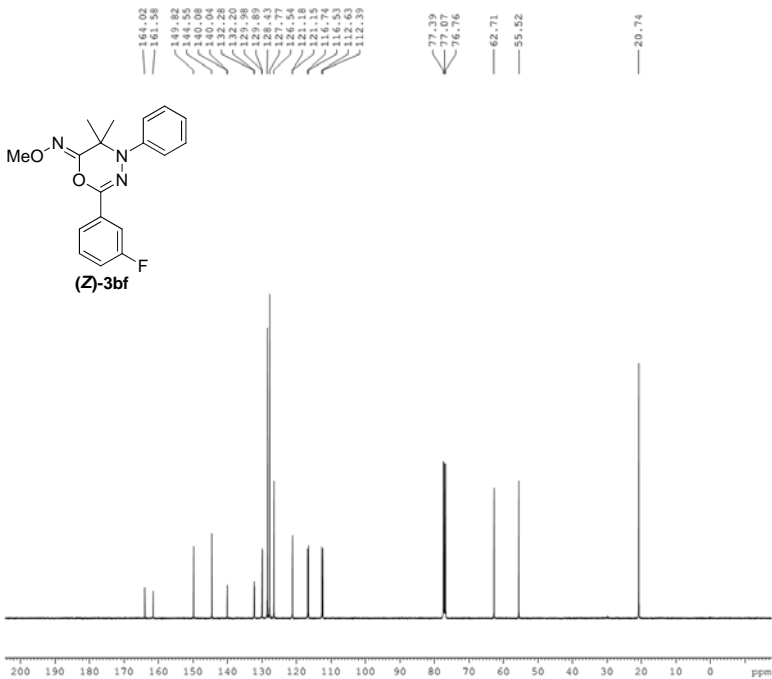

```

NAME      NMR
EXPNO     201732
PROCNO    1
Date_     20170308
Time      2.05 h
INSTRUM   spect
PROBHD    Z116098_0406 (
PULPROG   zgpg30
TD        65536
SOLVENT   CDCl3
NS         1024
DS         4
SWH        24038.461 Hz
FIDRES     0.366798 Hz
AQ         1.3631988 sec
RG         196.12
DW         20.800 usec
DE         6.50 usec
TE         294.3 K
D1         2.00000000 sec
D11        0.03000000 sec
TD0        1
SFO1       100.6228298 MHz
NUC1       13C
P1         10.00 usec
SI         32768
SF         100.6127685 MHz
WDW        EM
SSB        0
LB         1.00 Hz
GB         0
PC         1.40
  
```



## 6. X-Ray crystal data of compound (Z)-3ae

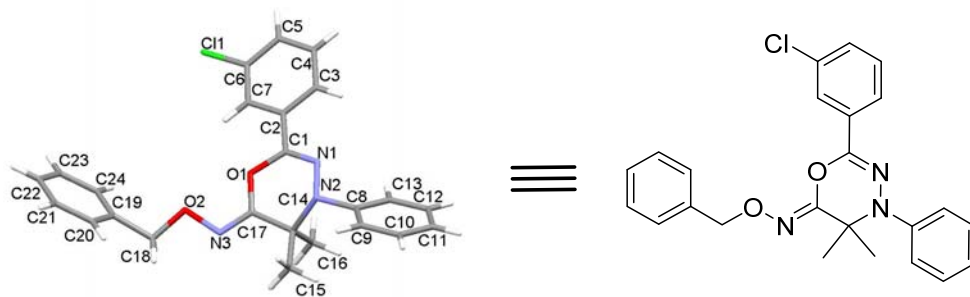

**Figure 1.** X-ray single crystal structure of (Z)-3ae (with thermal ellipsoids shown at the 50% probability level)

|                                 |                                                                 |                         |
|---------------------------------|-----------------------------------------------------------------|-------------------------|
| Identification code             | <b>(Z)-3ae</b>                                                  |                         |
| Empirical formula               | C <sub>24</sub> H <sub>22</sub> ClN <sub>3</sub> O <sub>2</sub> |                         |
| Formula weight                  | 419.89                                                          |                         |
| Temperature                     | 113 K                                                           |                         |
| Crystal system, space group     | Triclinic, P-1                                                  |                         |
| Unit cell dimensions            | a = 7.9332(14) Å                                                | alpha = 96.881(4) deg.  |
|                                 | b = 10.9116(18) Å                                               | beta = 92.036(2) deg.   |
|                                 | c = 12.9665(19) Å                                               | gamma = 109.013(5) deg. |
| Volume                          | 1050.2(3) Å <sup>3</sup>                                        |                         |
| Z, Calculated density           | 2, 1.328 g/cm <sup>3</sup>                                      |                         |
| Absorption coefficient          | 0.208 mm <sup>-1</sup>                                          |                         |
| F(000)                          | 440.0                                                           |                         |
| Crystal size                    | 0.2 × 0.18 × 0.14 mm <sup>3</sup>                               |                         |
| Radiation                       | MoKα (λ = 0.71073)                                              |                         |
| Theta range for data collection | 6.084 to 55.034 deg.                                            |                         |
| Index ranges                    | -10 ≤ h ≤ 10, -13 ≤ k ≤ 14, -16 ≤ l ≤ 16                        |                         |

|                                                          |                                               |
|----------------------------------------------------------|-----------------------------------------------|
| Reflections collected /<br>uniqueIndependent reflections | 13555 / 4737 [Rint = 0.0248, Rsigma = 0.0237] |
| Data / restraints / parameters                           | 4737/84/313                                   |
| Goodness-of-fit on F <sup>2</sup>                        | 1.027                                         |
| Final R indices [I > 2sigma(I)]                          | R1 = 0.0334, wR2 = 0.0867                     |
| R indices (all data)                                     | R1 = 0.0399, wR2 = 0.0905                     |
| Largest diff. peak and hole                              | 0.30/-0.29 e.A <sup>-3</sup>                  |

## 7. Computational methods

(1) The geometric structures of all reactants, transition states (TS), intermediates (Int) and products were optimized by the density functional theory (DFT) method with the hybrid functional B3LYP<sup>6-8</sup> at the 6-31+G(d) theoretical level. The analytical computations of vibrational frequencies were performed for all stationary points to verify either that they were energy minima with all positive frequencies or that they were transition states with only one imaginary frequency. The intrinsic reaction coordinate (IRC) calculations were performed to confirm that every transition state connects the corresponding reactant and product through the minimized-energy pathway. Cartesian coordinates, the number of imaginary frequencies and computed thermochemical values of the optimized geometries are provided in the Supporting Information. All computations presented in this work were performed with GAUSSIAN 09 program package.

### Cartesian coordinates, the number of imaginary frequencies and computed thermochemical values of the optimized structures

Structure Number: 4

SCF Energy at B3LYP/6-31+G(d) theoretical level: -632.11403938 (Hartrees)

| Center Number | Atomic Number | Atomic Type | Coordinates (Angstroms) |           |           |
|---------------|---------------|-------------|-------------------------|-----------|-----------|
|               |               |             | X                       | Y         | Z         |
| 1             | 8             | 0           | -1.836762               | 0.989761  | 0.514411  |
| 2             | 8             | 0           | -0.117040               | -0.513872 | -0.944107 |
| 3             | 7             | 0           | -1.515820               | -0.882075 | -0.877111 |
| 4             | 6             | 0           | -3.756535               | -0.241215 | -0.207362 |
| 5             | 6             | 0           | -4.255154               | -0.644247 | 1.181481  |
| 6             | 1             | 0           | -5.345361               | -0.753897 | 1.210539  |
| 7             | 1             | 0           | -3.961780               | 0.155736  | 1.866003  |
| 8             | 1             | 0           | -3.793493               | -1.572326 | 1.530007  |
| 9             | 6             | 0           | -4.462615               | 1.033856  | -0.687192 |
| 10            | 1             | 0           | -4.163839               | 1.307369  | -1.705607 |
| 11            | 1             | 0           | -4.166739               | 1.855233  | -0.031323 |
| 12            | 1             | 0           | -5.551745               | 0.912677  | -0.657161 |
| 13            | 6             | 0           | -2.203461               | 0.008374  | -0.166645 |
| 14            | 6             | 0           | 0.591731                | -0.944849 | 0.222863  |
| 15            | 1             | 0           | 0.613318                | -2.045346 | 0.262646  |
| 16            | 1             | 0           | 0.071424                | -0.569627 | 1.112517  |
| 17            | 6             | 0           | 1.989542                | -0.381370 | 0.154479  |
| 18            | 6             | 0           | 3.109462                | -1.212922 | 0.037308  |
| 19            | 1             | 0           | 2.972051                | -2.291616 | -0.011997 |
| 20            | 6             | 0           | 4.399975                | -0.673231 | -0.012672 |
| 21            | 1             | 0           | 5.260638                | -1.332805 | -0.098178 |
| 22            | 6             | 0           | 4.579611                | 0.710631  | 0.045037  |
| 23            | 1             | 0           | 5.580817                | 1.133682  | 0.006800  |
| 24            | 6             | 0           | 3.464397                | 1.550671  | 0.154585  |
| 25            | 1             | 0           | 3.599101                | 2.628921  | 0.201886  |
| 26            | 6             | 0           | 2.179553                | 1.008778  | 0.210595  |

27            1            0            1.307747    1.652560    0.296351

---

|                                              |                             |
|----------------------------------------------|-----------------------------|
| Zero-point correction=                       | 0.219653 (Hartree/Particle) |
| Thermal correction to Energy=                | 0.233526                    |
| Thermal correction to Enthalpy=              | 0.234470                    |
| Thermal correction to Gibbs Free Energy=     | 0.175691                    |
| Sum of electronic and zero-point Energies=   | -631.894386                 |
| Sum of electronic and thermal Energies=      | -631.880513                 |
| Sum of electronic and thermal Enthalpies=    | -631.879569                 |
| Sum of electronic and thermal Free Energies= | -631.938349                 |

Structure Number: 5

SCF Energy at B3LYP/6-31+G(d) theoretical level: -1070.43974016 (Hartrees)

---

| Center<br>Number | Atomic<br>Number | Atomic<br>Type | Coordinates (Angstroms) |           |           |
|------------------|------------------|----------------|-------------------------|-----------|-----------|
|                  |                  |                | X                       | Y         | Z         |
| 1                | 17               | 0              | 4.269372                | 2.125701  | 0.000034  |
| 2                | 7                | 0              | -0.973275               | -1.194222 | -0.001371 |
| 3                | 7                | 0              | -2.190125               | -1.525746 | -0.000717 |
| 4                | 6                | 0              | 0.188955                | -1.028347 | -0.002725 |
| 5                | 6                | 0              | 1.598594                | -0.892921 | -0.001326 |
| 6                | 6                | 0              | 2.434564                | -2.031472 | 0.000368  |
| 7                | 1                | 0              | 1.994677                | -3.023504 | 0.000550  |
| 8                | 6                | 0              | 3.816988                | -1.871260 | 0.001787  |
| 9                | 1                | 0              | 4.456868                | -2.749266 | 0.002991  |
| 10               | 6                | 0              | 4.396883                | -0.598730 | 0.001709  |
| 11               | 1                | 0              | 5.474406                | -0.474436 | 0.002856  |
| 12               | 6                | 0              | 3.559353                | 0.519355  | 0.000145  |
| 13               | 6                | 0              | 2.173978                | 0.397951  | -0.001346 |
| 14               | 1                | 0              | 1.544362                | 1.280690  | -0.002581 |
| 15               | 6                | 0              | -3.142013               | -0.491021 | -0.000154 |
| 16               | 6                | 0              | -4.490698               | -0.893180 | 0.000732  |
| 17               | 1                | 0              | -4.715450               | -1.955843 | 0.000948  |
| 18               | 6                | 0              | -5.506793               | 0.058597  | 0.001297  |
| 19               | 1                | 0              | -6.543885               | -0.267875 | 0.001971  |
| 20               | 6                | 0              | -5.202711               | 1.425914  | 0.000993  |
| 21               | 1                | 0              | -5.997841               | 2.166351  | 0.001454  |
| 22               | 6                | 0              | -3.863792               | 1.827321  | 0.000129  |
| 23               | 1                | 0              | -3.613426               | 2.885656  | -0.000100 |
| 24               | 6                | 0              | -2.835823               | 0.882680  | -0.000440 |
| 25               | 1                | 0              | -1.800138               | 1.211758  | -0.001069 |

---

Zero-point correction= 0.185600 (Hartree/Particle)  
Thermal correction to Energy= 0.199025  
Thermal correction to Enthalpy= 0.199969  
Thermal correction to Gibbs Free Energy= 0.142175  
Sum of electronic and zero-point Energies= -1070.254140  
Sum of electronic and thermal Energies= -1070.240715  
Sum of electronic and thermal Enthalpies= -1070.239771  
Sum of electronic and thermal Free Energies= -1070.297565

Structure Number: **TS1**

SCF Energy at B3LYP/6-31+G(d) theoretical level: -1702.54919172 (Hartrees)

Number of imaginary frequencies: -140.23i cm<sup>-1</sup>

---

| Center<br>Number | Atomic<br>Number | Atomic<br>Type | Coordinates (Angstroms) |           |           |
|------------------|------------------|----------------|-------------------------|-----------|-----------|
|                  |                  |                | X                       | Y         | Z         |
| 1                | 17               | 0              | -1.979819               | 5.507204  | 0.515449  |
| 2                | 8                | 0              | 0.216075                | -1.047569 | -2.325813 |
| 3                | 8                | 0              | -1.124317               | -1.913205 | -0.206994 |
| 4                | 7                | 0              | 1.859549                | 0.772485  | -0.573038 |
| 5                | 7                | 0              | 2.937597                | 0.080408  | -0.743481 |
| 6                | 7                | 0              | 0.256730                | -2.119576 | -0.222807 |
| 7                | 6                | 0              | 0.835057                | 1.330337  | -0.639793 |
| 8                | 6                | 0              | -0.416040               | 2.011580  | -0.721314 |
| 9                | 6                | 0              | -1.490799               | 1.391595  | -1.392776 |
| 10               | 1                | 0              | -1.338418               | 0.404925  | -1.827846 |
| 11               | 6                | 0              | -2.705888               | 2.071864  | -1.466065 |
| 12               | 1                | 0              | -3.543737               | 1.608303  | -1.976749 |
| 13               | 6                | 0              | -2.866984               | 3.332718  | -0.883121 |
| 14               | 1                | 0              | -3.816760               | 3.854838  | -0.938368 |
| 15               | 6                | 0              | -1.786395               | 3.922469  | -0.219892 |
| 16               | 6                | 0              | -0.555708               | 3.283872  | -0.130947 |
| 17               | 1                | 0              | 0.275181                | 3.755727  | 0.379050  |
| 18               | 6                | 0              | 3.853737                | 0.131214  | 0.339129  |
| 19               | 6                | 0              | 3.485535                | 0.431478  | 1.661265  |
| 20               | 1                | 0              | 2.448070                | 0.642392  | 1.901368  |
| 21               | 6                | 0              | 4.453753                | 0.445316  | 2.667548  |
| 22               | 1                | 0              | 4.158878                | 0.681674  | 3.686989  |
| 23               | 6                | 0              | 5.788381                | 0.149158  | 2.375515  |
| 24               | 1                | 0              | 6.536050                | 0.160744  | 3.162890  |
| 25               | 6                | 0              | 6.152649                | -0.157842 | 1.059386  |
| 26               | 1                | 0              | 7.188678                | -0.381081 | 0.818205  |
| 27               | 6                | 0              | 5.195567                | -0.163794 | 0.044807  |
| 28               | 1                | 0              | 5.475645                | -0.370998 | -0.983239 |
| 29               | 6                | 0              | 2.239618                | -1.915125 | -1.407380 |
| 30               | 6                | 0              | 2.915502                | -2.791599 | -0.401386 |
| 31               | 1                | 0              | 3.983004                | -2.561709 | -0.328616 |
| 32               | 1                | 0              | 2.835389                | -3.829319 | -0.762258 |
| 33               | 1                | 0              | 2.444923                | -2.742853 | 0.579074  |
| 34               | 6                | 0              | 2.870597                | -1.826822 | -2.759108 |
| 35               | 1                | 0              | 2.439987                | -1.010606 | -3.340430 |
| 36               | 1                | 0              | 2.631083                | -2.761956 | -3.289695 |
| 37               | 1                | 0              | 3.959332                | -1.742093 | -2.700179 |
| 38               | 6                | 0              | 0.776398                | -1.652473 | -1.367399 |
| 39               | 6                | 0              | -1.659541               | -2.512120 | 0.976723  |
| 40               | 1                | 0              | -1.245648               | -2.013899 | 1.864689  |
| 41               | 1                | 0              | -1.342910               | -3.565457 | 1.005923  |
| 42               | 6                | 0              | -3.165204               | -2.403080 | 0.949752  |
| 43               | 6                | 0              | -3.872707               | -2.043162 | 2.105162  |



|    |   |   |           |           |           |
|----|---|---|-----------|-----------|-----------|
| 44 | 1 | 0 | -3.325737 | -1.797130 | 3.013949  |
| 45 | 6 | 0 | -5.270742 | -1.994336 | 2.103149  |
| 46 | 1 | 0 | -5.803367 | -1.715204 | 3.009397  |
| 47 | 6 | 0 | -5.978127 | -2.293636 | 0.936677  |
| 48 | 1 | 0 | -7.064256 | -2.252653 | 0.930904  |
| 49 | 6 | 0 | -5.278619 | -2.643935 | -0.224376 |
| 50 | 1 | 0 | -5.822000 | -2.875115 | -1.138044 |
| 51 | 6 | 0 | -3.884297 | -2.702187 | -0.217414 |
| 52 | 1 | 0 | -3.342122 | -2.966976 | -1.120776 |

---

|                                              |                             |
|----------------------------------------------|-----------------------------|
| Zero-point correction=                       | 0.406264 (Hartree/Particle) |
| Thermal correction to Energy=                | 0.434077                    |
| Thermal correction to Enthalpy=              | 0.435021                    |
| Thermal correction to Gibbs Free Energy=     | 0.343060                    |
| Sum of electronic and zero-point Energies=   | -1702.142927                |
| Sum of electronic and thermal Energies=      | -1702.115115                |
| Sum of electronic and thermal Enthalpies=    | -1702.114171                |
| Sum of electronic and thermal Free Energies= | -1702.206132                |

Structure Number: **Int1**

SCF Energy at B3LYP/6-31+G(d) theoretical level: -1702.56622518 (Hartrees)

---

| Center<br>Number | Atomic<br>Number | Atomic<br>Type | Coordinates (Angstroms) |           |           |
|------------------|------------------|----------------|-------------------------|-----------|-----------|
|                  |                  |                | X                       | Y         | Z         |
| 1                | 17               | 0              | -8.018838               | -0.005580 | -1.091279 |
| 2                | 8                | 0              | 1.794873                | -1.319244 | 0.748909  |
| 3                | 8                | 0              | 3.698952                | -0.448448 | -1.131961 |
| 4                | 7                | 0              | -1.994081               | -0.038131 | 0.090360  |
| 5                | 7                | 0              | -0.667201               | 0.026698  | 0.072782  |
| 6                | 7                | 0              | 2.408424                | -0.306137 | -1.321811 |
| 7                | 6                | 0              | -3.118768               | -0.242737 | 0.329658  |
| 8                | 6                | 0              | -4.475907               | -0.477892 | 0.641217  |
| 9                | 6                | 0              | -4.813749               | -1.026720 | 1.889459  |
| 10               | 1                | 0              | -4.027580               | -1.278044 | 2.619563  |
| 11               | 6                | 0              | -6.155002               | -1.250784 | 2.192898  |
| 12               | 1                | 0              | -6.428670               | -1.681815 | 3.169468  |
| 13               | 6                | 0              | -7.153048               | -0.935197 | 1.271549  |
| 14               | 1                | 0              | -8.211957               | -1.116131 | 1.520408  |
| 15               | 6                | 0              | -6.807230               | -0.388716 | 0.028462  |
| 16               | 6                | 0              | -5.468868               | -0.156018 | -0.298123 |
| 17               | 1                | 0              | -5.197003               | 0.272253  | -1.276393 |
| 18               | 6                | 0              | -0.135293               | 1.385939  | 0.105929  |
| 19               | 6                | 0              | 0.868375                | 1.642460  | 1.060357  |
| 20               | 1                | 0              | 1.265822                | 0.819821  | 1.686427  |
| 21               | 6                | 0              | 1.399606                | 2.927908  | 1.155761  |
| 22               | 1                | 0              | 2.194283                | 3.125460  | 1.891792  |
| 23               | 6                | 0              | 0.945761                | 3.949637  | 0.323857  |
| 24               | 1                | 0              | 1.374236                | 4.959662  | 0.407253  |
| 25               | 6                | 0              | -0.041042               | 3.688029  | -0.626911 |
| 26               | 1                | 0              | -0.386615               | 4.489094  | -1.297078 |
| 27               | 6                | 0              | -0.582635               | 2.410786  | -0.746265 |
| 28               | 1                | 0              | -1.341734               | 2.215365  | -1.518065 |
| 29               | 6                | 0              | 0.050977                | -0.910387 | -0.875827 |
| 30               | 6                | 0              | -0.160668               | -0.539486 | -2.337800 |
| 31               | 1                | 0              | -1.224408               | -0.704239 | -2.638934 |
| 32               | 1                | 0              | 0.492241                | -1.190441 | -2.970541 |
| 33               | 1                | 0              | 0.117363                | 0.524030  | -2.537083 |
| 34               | 6                | 0              | -0.391337               | -2.357970 | -0.661816 |
| 35               | 1                | 0              | -0.273827               | -2.652446 | 0.410085  |
| 36               | 1                | 0              | 0.287341                | -3.006867 | -1.269758 |
| 37               | 1                | 0              | -1.441605               | -2.530027 | -0.995400 |
| 38               | 6                | 0              | 1.582475                | -0.867032 | -0.414109 |
| 39               | 6                | 0              | 4.299527                | 0.239039  | 0.001082  |
| 40               | 1                | 0              | 3.721282                | 0.006085  | 0.936912  |
| 41               | 1                | 0              | 4.274973                | 1.343643  | -0.193142 |
| 42               | 6                | 0              | 5.700898                | -0.247593 | 0.142393  |
| 43               | 6                | 0              | 6.706647                | 0.636773  | 0.549771  |
| 44               | 1                | 0              | 6.466822                | 1.695909  | 0.722256  |

---

|    |   |   |          |           |           |
|----|---|---|----------|-----------|-----------|
| 45 | 6 | 0 | 8.010273 | 0.179598  | 0.734879  |
| 46 | 1 | 0 | 8.795052 | 0.878102  | 1.058355  |
| 47 | 6 | 0 | 8.320778 | -1.160877 | 0.508234  |
| 48 | 1 | 0 | 9.348753 | -1.520096 | 0.655863  |
| 49 | 6 | 0 | 7.323886 | -2.043637 | 0.092102  |
| 50 | 1 | 0 | 7.567442 | -3.099895 | -0.091215 |
| 51 | 6 | 0 | 6.018436 | -1.590828 | -0.090129 |
| 52 | 1 | 0 | 5.222869 | -2.275817 | -0.423706 |

---

|                                              |                             |
|----------------------------------------------|-----------------------------|
| Zero-point correction=                       | 0.409236 (Hartree/Particle) |
| Thermal correction to Energy=                | 0.436912                    |
| Thermal correction to Enthalpy=              | 0.437856                    |
| Thermal correction to Gibbs Free Energy=     | 0.346186                    |
| Sum of electronic and zero-point Energies=   | -1702.156990                |
| Sum of electronic and thermal Energies=      | -1702.129313                |
| Sum of electronic and thermal Enthalpies=    | -1702.128369                |
| Sum of electronic and thermal Free Energies= | -1702.220039                |

Structure Number: **3ae**

SCF Energy at B3LYP/6-31+G(d) theoretical level: -1702.65437723 (Hartrees)

---

| Center<br>Number | Atomic<br>Number | Atomic<br>Type | Coordinates (Angstroms) |           |           |
|------------------|------------------|----------------|-------------------------|-----------|-----------|
|                  |                  |                | X                       | Y         | Z         |
| 1                | 17               | 0              | -3.088620               | 5.280017  | -0.413587 |
| 2                | 8                | 0              | 0.410284                | -0.018227 | 0.332827  |
| 3                | 8                | 0              | 2.606169                | -1.257351 | 0.158849  |
| 4                | 7                | 0              | -1.891888               | 0.027814  | -0.148282 |
| 5                | 7                | 0              | -1.897044               | -1.349792 | -0.207054 |
| 6                | 7                | 0              | 1.480657                | -2.057861 | 0.379077  |
| 7                | 6                | 0              | -0.791364               | 0.628654  | 0.109986  |
| 8                | 6                | 0              | -0.680156               | 2.096472  | 0.143034  |
| 9                | 6                | 0              | 0.554728                | 2.705187  | 0.429251  |
| 10               | 1                | 0              | 1.417889                | 2.080891  | 0.632514  |
| 11               | 6                | 0              | 0.657321                | 4.092914  | 0.453591  |
| 12               | 1                | 0              | 1.613197                | 4.559188  | 0.677067  |
| 13               | 6                | 0              | -0.456414               | 4.899778  | 0.193595  |
| 14               | 1                | 0              | -0.380596               | 5.982061  | 0.209873  |
| 15               | 6                | 0              | -1.674684               | 4.283628  | -0.086613 |
| 16               | 6                | 0              | -1.805791               | 2.896039  | -0.114142 |
| 17               | 1                | 0              | -2.765825               | 2.441209  | -0.326532 |
| 18               | 6                | 0              | -3.231941               | -1.872543 | -0.340036 |
| 19               | 6                | 0              | -3.472751               | -2.909273 | -1.249696 |
| 20               | 1                | 0              | -2.652988               | -3.292108 | -1.848908 |
| 21               | 6                | 0              | -4.761284               | -3.427228 | -1.400494 |
| 22               | 1                | 0              | -4.935653               | -4.231265 | -2.110936 |
| 23               | 6                | 0              | -5.824324               | -2.899130 | -0.662882 |
| 24               | 1                | 0              | -6.828313               | -3.295748 | -0.788884 |
| 25               | 6                | 0              | -5.589774               | -1.846059 | 0.226419  |
| 26               | 1                | 0              | -6.411757               | -1.420583 | 0.796808  |
| 27               | 6                | 0              | -4.300724               | -1.335423 | 0.391180  |
| 28               | 1                | 0              | -4.118044               | -0.508417 | 1.069825  |
| 29               | 6                | 0              | -0.938738               | -2.037866 | 0.725293  |
| 30               | 6                | 0              | -0.870593               | -3.541925 | 0.446072  |
| 31               | 1                | 0              | -1.829262               | -4.014900 | 0.673365  |
| 32               | 1                | 0              | -0.101380               | -3.990567 | 1.078694  |
| 33               | 1                | 0              | -0.608200               | -3.741770 | -0.595929 |
| 34               | 6                | 0              | -1.324592               | -1.791221 | 2.205496  |
| 35               | 1                | 0              | -1.375288               | -0.724074 | 2.443133  |
| 36               | 1                | 0              | -0.583104               | -2.253693 | 2.865021  |
| 37               | 1                | 0              | -2.302424               | -2.237983 | 2.413818  |
| 38               | 6                | 0              | 0.400663                | -1.378562 | 0.438621  |
| 39               | 6                | 0              | 3.769510                | -2.109704 | 0.083337  |
| 40               | 1                | 0              | 3.625391                | -2.828887 | -0.731771 |
| 41               | 1                | 0              | 3.863837                | -2.661853 | 1.026032  |
| 42               | 6                | 0              | 4.965718                | -1.228979 | -0.162441 |
| 43               | 6                | 0              | 5.346976                | -0.895338 | -1.469324 |
| 44               | 1                | 0              | 4.778004                | -1.288475 | -2.309040 |

---

|    |   |   |          |           |           |
|----|---|---|----------|-----------|-----------|
| 45 | 6 | 0 | 6.444562 | -0.063107 | -1.699901 |
| 46 | 1 | 0 | 6.730306 | 0.187132  | -2.718460 |
| 47 | 6 | 0 | 7.174831 | 0.445423  | -0.621480 |
| 48 | 1 | 0 | 8.030856 | 1.091536  | -0.799215 |
| 49 | 6 | 0 | 6.802495 | 0.119213  | 0.685883  |
| 50 | 1 | 0 | 7.367200 | 0.511427  | 1.527907  |
| 51 | 6 | 0 | 5.703840 | -0.713414 | 0.911513  |
| 52 | 1 | 0 | 5.413903 | -0.965112 | 1.929434  |

---

|                                              |                             |
|----------------------------------------------|-----------------------------|
| Zero-point correction=                       | 0.412874 (Hartree/Particle) |
| Thermal correction to Energy=                | 0.439153                    |
| Thermal correction to Enthalpy=              | 0.440097                    |
| Thermal correction to Gibbs Free Energy=     | 0.352236                    |
| Sum of electronic and zero-point Energies=   | -1702.241503                |
| Sum of electronic and thermal Energies=      | -1702.215224                |
| Sum of electronic and thermal Enthalpies=    | -1702.214280                |
| Sum of electronic and thermal Free Energies= | -1702.302142                |

Structure Number: **TS2**

SCF Energy at B3LYP/6-31+G(d) theoretical level: -1702.53557663 (Hartrees)

Number of imaginary frequencies: -227.25i cm<sup>-1</sup>

---

| Center<br>Number | Atomic<br>Number | Atomic<br>Type | Coordinates (Angstroms) |           |           |
|------------------|------------------|----------------|-------------------------|-----------|-----------|
|                  |                  |                | X                       | Y         | Z         |
| 1                | 17               | 0              | -4.484057               | 5.157505  | 0.199745  |
| 2                | 8                | 0              | 2.185975                | -1.550673 | 2.295221  |
| 3                | 8                | 0              | 2.153553                | 0.040162  | 0.101178  |
| 4                | 7                | 0              | -2.059439               | -0.688687 | 0.470726  |
| 5                | 7                | 0              | -1.773098               | -1.940518 | 0.624826  |
| 6                | 7                | 0              | 1.033524                | -0.837249 | 0.370126  |
| 7                | 6                | 0              | -2.380408               | 0.433149  | 0.451786  |
| 8                | 6                | 0              | -2.239573               | 1.820404  | 0.143419  |
| 9                | 6                | 0              | -0.982659               | 2.276160  | -0.308386 |
| 10               | 1                | 0              | -0.156021               | 1.577187  | -0.416358 |
| 11               | 6                | 0              | -0.834578               | 3.633908  | -0.586926 |
| 12               | 1                | 0              | 0.127081                | 4.006118  | -0.927365 |
| 13               | 6                | 0              | -1.906114               | 4.518899  | -0.436784 |
| 14               | 1                | 0              | -1.786409               | 5.574207  | -0.661349 |
| 15               | 6                | 0              | -3.143975               | 4.043326  | 0.010328  |
| 16               | 6                | 0              | -3.325591               | 2.699530  | 0.315121  |
| 17               | 1                | 0              | -4.281636               | 2.334551  | 0.674089  |
| 18               | 6                | 0              | -2.134815               | -2.774255 | -0.513982 |
| 19               | 6                | 0              | -1.516878               | -2.583642 | -1.752572 |
| 20               | 1                | 0              | -0.737932               | -1.830249 | -1.833104 |
| 21               | 6                | 0              | -1.897273               | -3.392647 | -2.825928 |
| 22               | 1                | 0              | -1.421387               | -3.257084 | -3.793518 |
| 23               | 6                | 0              | -2.875148               | -4.378377 | -2.657130 |
| 24               | 1                | 0              | -3.163488               | -5.006683 | -3.495775 |
| 25               | 6                | 0              | -3.482561               | -4.558228 | -1.410542 |
| 26               | 1                | 0              | -4.243693               | -5.322195 | -1.277565 |
| 27               | 6                | 0              | -3.117071               | -3.749251 | -0.331615 |
| 28               | 1                | 0              | -3.584487               | -3.868673 | 0.641454  |
| 29               | 6                | 0              | -0.052459               | -2.320687 | 1.951303  |
| 30               | 6                | 0              | 0.268115                | -3.815544 | 1.900557  |
| 31               | 1                | 0              | -0.564100               | -4.426707 | 2.268409  |
| 32               | 1                | 0              | 1.135627                | -3.973859 | 2.546291  |
| 33               | 1                | 0              | 0.534103                | -4.144307 | 0.892045  |
| 34               | 6                | 0              | -0.472211               | -1.904718 | 3.367413  |
| 35               | 1                | 0              | -0.764055               | -0.849269 | 3.413256  |
| 36               | 1                | 0              | 0.386871                | -2.032165 | 4.029306  |
| 37               | 1                | 0              | -1.306583               | -2.519630 | 3.724481  |
| 38               | 6                | 0              | 1.210030                | -1.487714 | 1.517406  |
| 39               | 6                | 0              | 3.238389                | -0.670594 | -0.505348 |
| 40               | 1                | 0              | 2.940591                | -1.027023 | -1.504055 |
| 41               | 1                | 0              | 3.487588                | -1.537293 | 0.118935  |
| 42               | 6                | 0              | 4.416737                | 0.266950  | -0.597891 |
| 43               | 6                | 0              | 4.930814                | 0.677360  | -1.833495 |

---

|    |   |   |          |          |           |
|----|---|---|----------|----------|-----------|
| 44 | 1 | 0 | 4.468317 | 0.318475 | -2.751205 |
| 45 | 6 | 0 | 6.032418 | 1.538276 | -1.900433 |
| 46 | 1 | 0 | 6.423868 | 1.843767 | -2.868179 |
| 47 | 6 | 0 | 6.625002 | 2.004860 | -0.724926 |
| 48 | 1 | 0 | 7.481299 | 2.673667 | -0.772899 |
| 49 | 6 | 0 | 6.112563 | 1.605568 | 0.515776  |
| 50 | 1 | 0 | 6.571720 | 1.964556 | 1.434095  |
| 51 | 6 | 0 | 5.018073 | 0.742009 | 0.578747  |
| 52 | 1 | 0 | 4.613592 | 0.425838 | 1.537020  |

-----

|                                              |                             |
|----------------------------------------------|-----------------------------|
| Zero-point correction=                       | 0.405318 (Hartree/Particle) |
| Thermal correction to Energy=                | 0.434041                    |
| Thermal correction to Enthalpy=              | 0.434985                    |
| Thermal correction to Gibbs Free Energy=     | 0.339175                    |
| Sum of electronic and zero-point Energies=   | -1702.130259                |
| Sum of electronic and thermal Energies=      | -1702.101536                |
| Sum of electronic and thermal Enthalpies=    | -1702.100592                |
| Sum of electronic and thermal Free Energies= | -1702.196402                |

Structure Number: **Int2**

SCF Energy at B3LYP/6-31+G(d) theoretical level: -1702.56121065 (Hartrees)

| Center<br>Number | Atomic<br>Number | Atomic<br>Type | Coordinates (Angstroms) |           |           |
|------------------|------------------|----------------|-------------------------|-----------|-----------|
|                  |                  |                | X                       | Y         | Z         |
| 1                | 17               | 0              | 5.677474                | -3.420209 | -0.355289 |
| 2                | 8                | 0              | -1.853164               | 1.401355  | 2.535885  |
| 3                | 8                | 0              | -1.746715               | -0.658071 | 0.660299  |
| 4                | 7                | 0              | 1.632512                | 1.158460  | 0.221771  |
| 5                | 7                | 0              | 1.181778                | 2.370902  | 0.550051  |
| 6                | 7                | 0              | -0.917571               | 0.361709  | 0.627810  |
| 7                | 6                | 0              | 1.932125                | 0.033482  | 0.162821  |
| 8                | 6                | 0              | 2.333791                | -1.314397 | 0.034307  |
| 9                | 6                | 0              | 1.334592                | -2.303504 | 0.050302  |
| 10               | 1                | 0              | 0.266651                | -2.018738 | 0.154894  |
| 11               | 6                | 0              | 1.716897                | -3.641795 | -0.054274 |
| 12               | 1                | 0              | 0.944038                | -4.427296 | -0.034566 |
| 13               | 6                | 0              | 3.059007                | -3.991552 | -0.180478 |
| 14               | 1                | 0              | 3.349330                | -5.051905 | -0.263902 |
| 15               | 6                | 0              | 4.043663                | -2.992444 | -0.199852 |
| 16               | 6                | 0              | 3.692251                | -1.647277 | -0.089621 |
| 17               | 1                | 0              | 4.464764                | -0.862366 | -0.099461 |
| 18               | 6                | 0              | 0.813749                | 3.166420  | -0.619465 |
| 19               | 6                | 0              | -0.229462               | 2.821710  | -1.497256 |
| 20               | 1                | 0              | -0.832163               | 1.911222  | -1.330957 |
| 21               | 6                | 0              | -0.516470               | 3.647869  | -2.582763 |
| 22               | 1                | 0              | -1.337684               | 3.377136  | -3.264418 |
| 23               | 6                | 0              | 0.222155                | 4.808998  | -2.803374 |
| 24               | 1                | 0              | -0.013772               | 5.458622  | -3.659872 |
| 25               | 6                | 0              | 1.261088                | 5.147704  | -1.936335 |
| 26               | 1                | 0              | 1.844290                | 6.064955  | -2.107976 |
| 27               | 6                | 0              | 1.571110                | 4.331954  | -0.851008 |
| 28               | 1                | 0              | 2.393067                | 4.612065  | -0.173806 |
| 29               | 6                | 0              | 0.145200                | 2.373883  | 1.672029  |
| 30               | 6                | 0              | -0.554653               | 3.733399  | 1.703401  |
| 31               | 1                | 0              | 0.176471                | 4.566474  | 1.827392  |
| 32               | 1                | 0              | -1.256010               | 3.719210  | 2.577164  |
| 33               | 1                | 0              | -1.156412               | 3.899601  | 0.778363  |
| 34               | 6                | 0              | 0.887362                | 2.168248  | 2.997949  |
| 35               | 1                | 0              | 1.410281                | 1.183719  | 3.028919  |
| 36               | 1                | 0              | 0.118321                | 2.178267  | 3.812119  |
| 37               | 1                | 0              | 1.626951                | 2.982915  | 3.180407  |
| 38               | 6                | 0              | -0.982155               | 1.272988  | 1.628122  |
| 39               | 6                | 0              | -3.171236               | -0.368443 | 0.645805  |
| 40               | 1                | 0              | -3.381176               | 0.573869  | 0.073780  |
| 41               | 1                | 0              | -3.491509               | -0.222858 | 1.713450  |
| 42               | 6                | 0              | -3.903111               | -1.507402 | 0.022273  |
| 43               | 6                | 0              | -5.298051               | -1.418355 | -0.090602 |



|    |   |   |           |           |           |
|----|---|---|-----------|-----------|-----------|
| 44 | 1 | 0 | -5.816261 | -0.523234 | 0.284379  |
| 45 | 6 | 0 | -6.025067 | -2.454673 | -0.670782 |
| 46 | 1 | 0 | -7.118511 | -2.376694 | -0.756060 |
| 47 | 6 | 0 | -5.368549 | -3.591667 | -1.143523 |
| 48 | 1 | 0 | -5.943297 | -4.408300 | -1.602261 |
| 49 | 6 | 0 | -3.982594 | -3.687198 | -1.030729 |
| 50 | 1 | 0 | -3.463051 | -4.582702 | -1.400152 |
| 51 | 6 | 0 | -3.251991 | -2.650157 | -0.450850 |
| 52 | 1 | 0 | -2.157284 | -2.720935 | -0.361000 |

-----

|                                              |                             |
|----------------------------------------------|-----------------------------|
| Zero-point correction=                       | 0.409287 (Hartree/Particle) |
| Thermal correction to Energy=                | 0.436970                    |
| Thermal correction to Enthalpy=              | 0.437915                    |
| Thermal correction to Gibbs Free Energy=     | 0.346486                    |
| Sum of electronic and zero-point Energies=   | -1702.151923                |
| Sum of electronic and thermal Energies=      | -1702.124240                |
| Sum of electronic and thermal Enthalpies=    | -1702.123296                |
| Sum of electronic and thermal Free Energies= | -1702.214724                |

Structure Number: **3ae'**

SCF Energy at B3LYP/6-31+G(d) theoretical level: -1702.66345200 (Hartrees)

| Center<br>Number | Atomic<br>Number | Atomic<br>Type | Coordinates (Angstroms) |           |           |
|------------------|------------------|----------------|-------------------------|-----------|-----------|
|                  |                  |                | X                       | Y         | Z         |
| 1                | 17               | 0              | 0.730207                | 5.234874  | -1.146196 |
| 2                | 8                | 0              | 0.045052                | -3.177817 | 0.070616  |
| 3                | 8                | 0              | 1.554386                | -0.941667 | -0.113003 |
| 4                | 7                | 0              | -1.667033               | 0.431002  | 0.055553  |
| 5                | 7                | 0              | -2.378433               | -0.724991 | -0.176681 |
| 6                | 7                | 0              | 0.242440                | -0.918809 | 0.388486  |
| 7                | 6                | 0              | -0.407800               | 0.337774  | 0.309463  |
| 8                | 6                | 0              | 0.370709                | 1.580737  | 0.519530  |
| 9                | 6                | 0              | 1.348516                | 1.618106  | 1.525327  |
| 10               | 1                | 0              | 1.491111                | 0.746427  | 2.155158  |
| 11               | 6                | 0              | 2.122032                | 2.763254  | 1.709767  |
| 12               | 1                | 0              | 2.872045                | 2.787529  | 2.495701  |
| 13               | 6                | 0              | 1.939050                | 3.888125  | 0.900421  |
| 14               | 1                | 0              | 2.533343                | 4.784904  | 1.041942  |
| 15               | 6                | 0              | 0.970264                | 3.836481  | -0.101325 |
| 16               | 6                | 0              | 0.188576                | 2.701848  | -0.303066 |
| 17               | 1                | 0              | -0.536482               | 2.685116  | -1.108288 |
| 18               | 6                | 0              | -3.782253               | -0.458144 | -0.367040 |
| 19               | 6                | 0              | -4.457743               | -1.077237 | -1.424866 |
| 20               | 1                | 0              | -3.910737               | -1.734622 | -2.093124 |
| 21               | 6                | 0              | -5.818338               | -0.833265 | -1.627741 |
| 22               | 1                | 0              | -6.332829               | -1.319397 | -2.452679 |
| 23               | 6                | 0              | -6.508509               | 0.047780  | -0.790896 |
| 24               | 1                | 0              | -7.564564               | 0.244693  | -0.955842 |
| 25               | 6                | 0              | -5.827696               | 0.686705  | 0.250003  |
| 26               | 1                | 0              | -6.352891               | 1.383543  | 0.898484  |
| 27               | 6                | 0              | -4.471090               | 0.435505  | 0.464607  |
| 28               | 1                | 0              | -3.934362               | 0.943943  | 1.259184  |
| 29               | 6                | 0              | -1.975449               | -1.919528 | 0.636411  |
| 30               | 6                | 0              | -2.720922               | -3.181395 | 0.197293  |
| 31               | 1                | 0              | -3.788435               | -3.091637 | 0.413664  |
| 32               | 1                | 0              | -2.321714               | -4.037729 | 0.746132  |
| 33               | 1                | 0              | -2.584974               | -3.376978 | -0.869333 |
| 34               | 6                | 0              | -2.181320               | -1.686279 | 2.151520  |
| 35               | 1                | 0              | -1.686811               | -0.773991 | 2.498623  |
| 36               | 1                | 0              | -1.775376               | -2.533938 | 2.714900  |
| 37               | 1                | 0              | -3.250318               | -1.606100 | 2.375639  |
| 38               | 6                | 0              | -0.478353               | -2.102956 | 0.314314  |
| 39               | 6                | 0              | 2.494221                | -1.569777 | 0.811930  |
| 40               | 1                | 0              | 2.122619                | -2.567447 | 1.054259  |
| 41               | 1                | 0              | 2.559274                | -0.965552 | 1.722965  |
| 42               | 6                | 0              | 3.816289                | -1.631432 | 0.098701  |
| 43               | 6                | 0              | 4.061875                | -2.650539 | -0.833334 |
| 44               | 1                | 0              | 3.289757                | -3.391016 | -1.027833 |

|    |   |   |          |           |           |
|----|---|---|----------|-----------|-----------|
| 45 | 6 | 0 | 5.282169 | -2.711512 | -1.508059 |
| 46 | 1 | 0 | 5.463666 | -3.505797 | -2.227694 |
| 47 | 6 | 0 | 6.271171 | -1.754921 | -1.254861 |
| 48 | 1 | 0 | 7.223410 | -1.804963 | -1.777082 |
| 49 | 6 | 0 | 6.033849 | -0.736253 | -0.328111 |
| 50 | 1 | 0 | 6.799032 | 0.009373  | -0.127787 |
| 51 | 6 | 0 | 4.809504 | -0.674101 | 0.342645  |
| 52 | 1 | 0 | 4.624885 | 0.122395  | 1.060152  |

---

|                                              |                             |
|----------------------------------------------|-----------------------------|
| Zero-point correction=                       | 0.412945 (Hartree/Particle) |
| Thermal correction to Energy=                | 0.439168                    |
| Thermal correction to Enthalpy=              | 0.440112                    |
| Thermal correction to Gibbs Free Energy=     | 0.353241                    |
| Sum of electronic and zero-point Energies=   | -1702.250507                |
| Sum of electronic and thermal Energies=      | -1702.224284                |
| Sum of electronic and thermal Enthalpies=    | -1702.223340                |
| Sum of electronic and thermal Free Energies= | -1702.310211                |

(2) The relative Gibbs free energy in solvent was calculated in a hexafluoroisopropanol solution. The energy data of all structures in solvent were obtained from the single point energy calculation at the CPCM-B3LYP/6-311+G(d,p) theoretical level and the thermal correction to Gibbs free energy calculated at the B3LYP/6-31+G(d) theoretical level. The Gibbs free energy of [4 + 5] was set to 0 kcal/mol as a reference.

**Table S1** Relative Gibbs free energy of all stationary points for the two plausible reaction pathways obtained at the B3LYP/6-31+G(d) and the CPCM-B3LYP/6-311+G(d,p)//B3LYP/6-31+G(d) theoretical levels (kcal/mol)

| Structures | Computational methods |                                                |
|------------|-----------------------|------------------------------------------------|
|            | B3LYP/6-31+G(d)       | CPCM-B3LYP/6-311+G(d,p)//<br>B3LYP/6-31+G(d) * |
| Pathway 1  |                       |                                                |
| 4 + 5      | 0                     | 0                                              |
| TS1        | 18.7                  | 18.2                                           |
| Int1       | 10.0                  | 7.9                                            |
| 3ae        | -41.6                 | -34.0                                          |
| Pathway 2  |                       |                                                |
| 4 + 5      | 0                     | 0                                              |
| TS2        | 24.8                  | 24.9                                           |
| Int2       | 13.3                  | 10.4                                           |
| 3ae2       | -46.6                 | -41.6                                          |

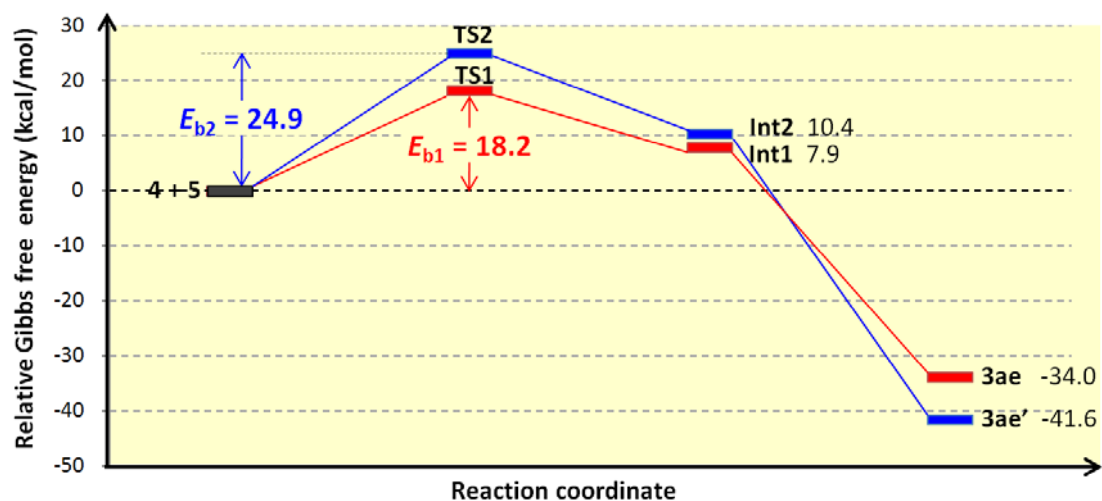

**Figure S1** Energy profile for the two plausible reaction pathways obtained at the CPCM-B3LYP/6-311+G(d,p)//B3LYP/6-31+G(d) theoretical level.

## 8. References

- (1) Jeffrey, C. S.; Barnes, K. L.; Eickhoff, J. A.; Carson, C. R. *J. Am. Chem. Soc.* **2011**, *133*, 7688.
- (2) Ji, W.; Yao, L.; Liao, X. *Org. Lett.* **2016**, *18*, 628.
- (3) Zhang, C.-Y.; Liu, X.-H.; Wang, B.-L.; Wang, S.-H.; Li, Z.-M. *Chemical Biology & Drug Design* **2010**, *75*, 489.
- (4) Wang, G.; Liu, X.; Huang, T.; Kuang, Y.; Lin, L.; Feng, X. *Org. Lett.* **2013**, *15*, 76.
- (5) Dadiboyena, S.; Valente, E. J.; Hamme, A. T. *Tetrahedron Lett.* **2009**, *50*, 291.
- (6) Becke, A. D. *Phys. Rev. A* **1988**, *38*, 3098.
- (7) Becke, A. D. *J. Chem. Phys.* **1993**, *98*, 5648.
- (8) Lee, C. T.; YANG, W. T. R.; PARR, G. *Phys. Rev. B* **1988**, *37*, 785.
